# Supplementary material for: The biosynthetic pathway for a thousand-year-old natural food colorant and citrinin in Penicillium marneffei
Source: PubMed Central journal article supplement — Sci Rep. 2014 Oct 22;4:6728. doi: 10.1038/srep06728 (PMC4205486; doi:10.1038/srep06728), 2014-10-22
Supplement: srep06728-s1.pdf [file srep06728-s1.pdf]

## Supplementary Information

# The biosynthetic pathway for a thousand-year-old natural food colorant and citrinin in *Penicillium marneffe*

Patrick C. Y. Woo<sup>1,2,3,4\*†</sup>, Ching-Wan Lam<sup>5†</sup> Emily W. T. Tam<sup>1†</sup>, Kim-Chung Lee<sup>5</sup>, Karrie K. Y. Yung<sup>5</sup>, Chris K. F. Leung<sup>5</sup>, Kong-Hung Sze<sup>1,2,3,4</sup>, Susanna K. P. Lau<sup>1,2,3,4\*</sup> and Kwok-Yung Yuen<sup>1,2,3,4</sup>

<sup>1</sup>Department of Microbiology, The University of Hong Kong, Hong Kong,

<sup>2</sup>State Key Laboratory of Emerging Infectious Diseases, The University of Hong Kong, Hong Kong,

<sup>3</sup>Research Centre of Infection and Immunology, The University of Hong Kong, Hong Kong,

<sup>4</sup>Carol Yu Centre for Infection, The University of Hong Kong, Hong Kong,

<sup>5</sup>Department of Pathology, The University of Hong Kong, Hong Kong

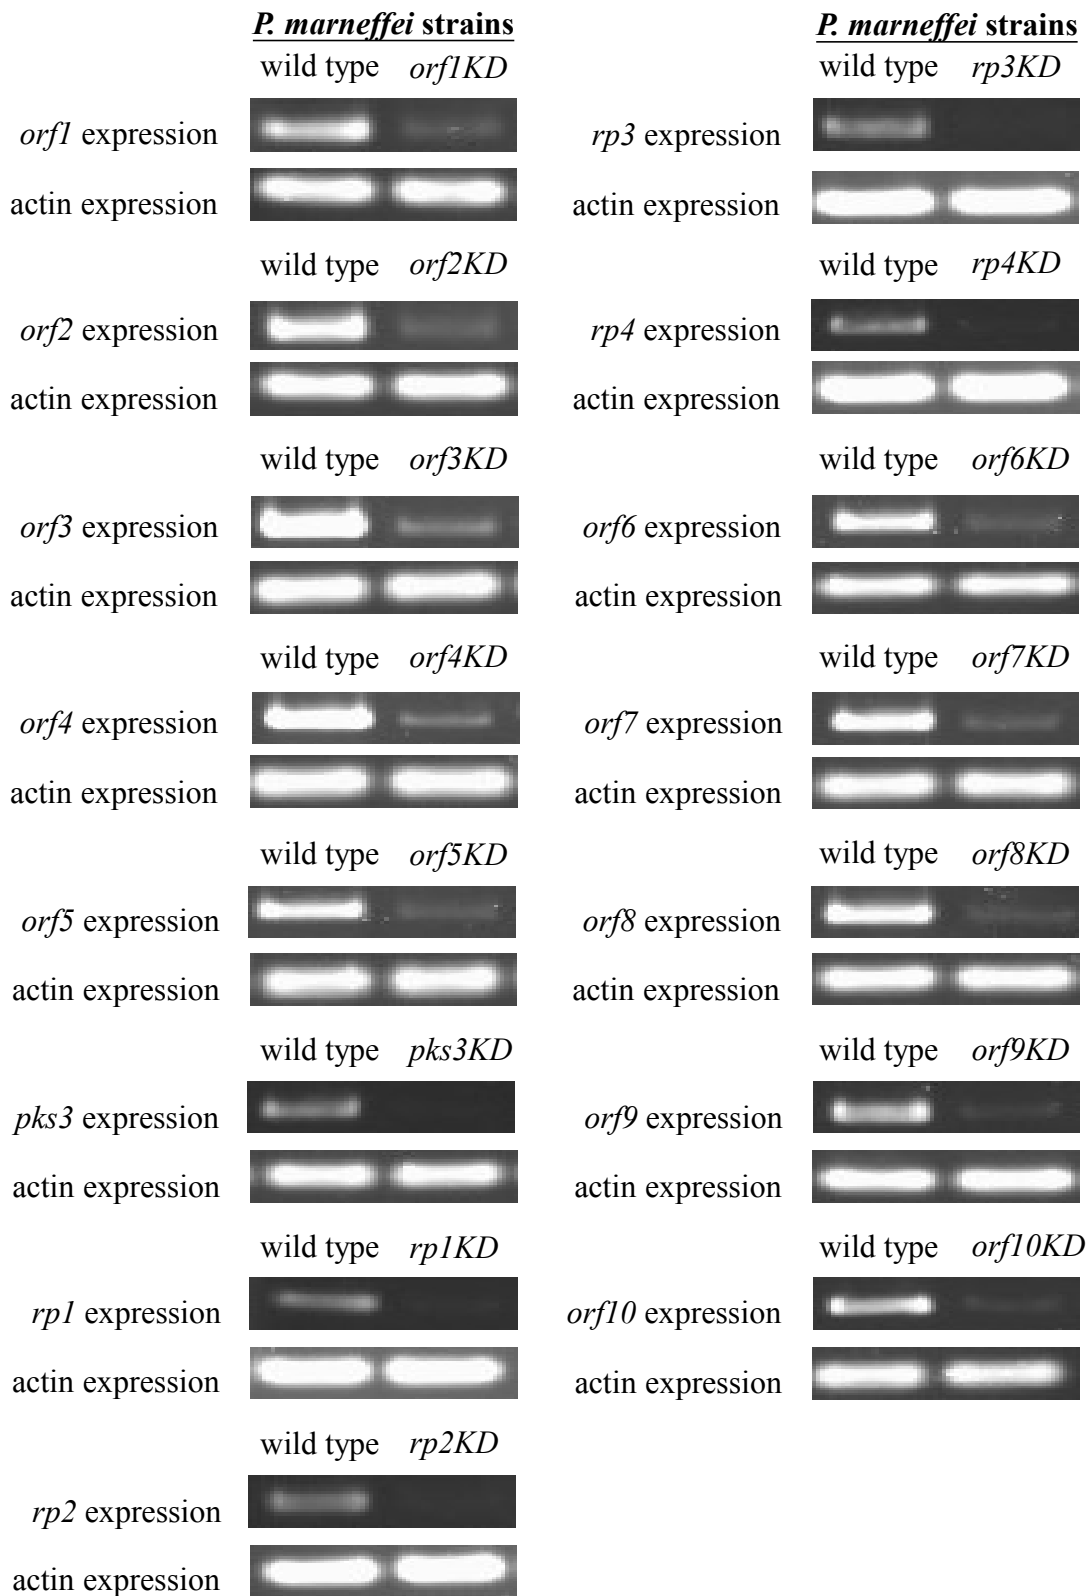

**Supplementary Figure S1: Expression of *pks3* and the 14 genes upstream and downstream of *pks3* in the corresponding knockdown mutants of *Penicillium marneffei*.**

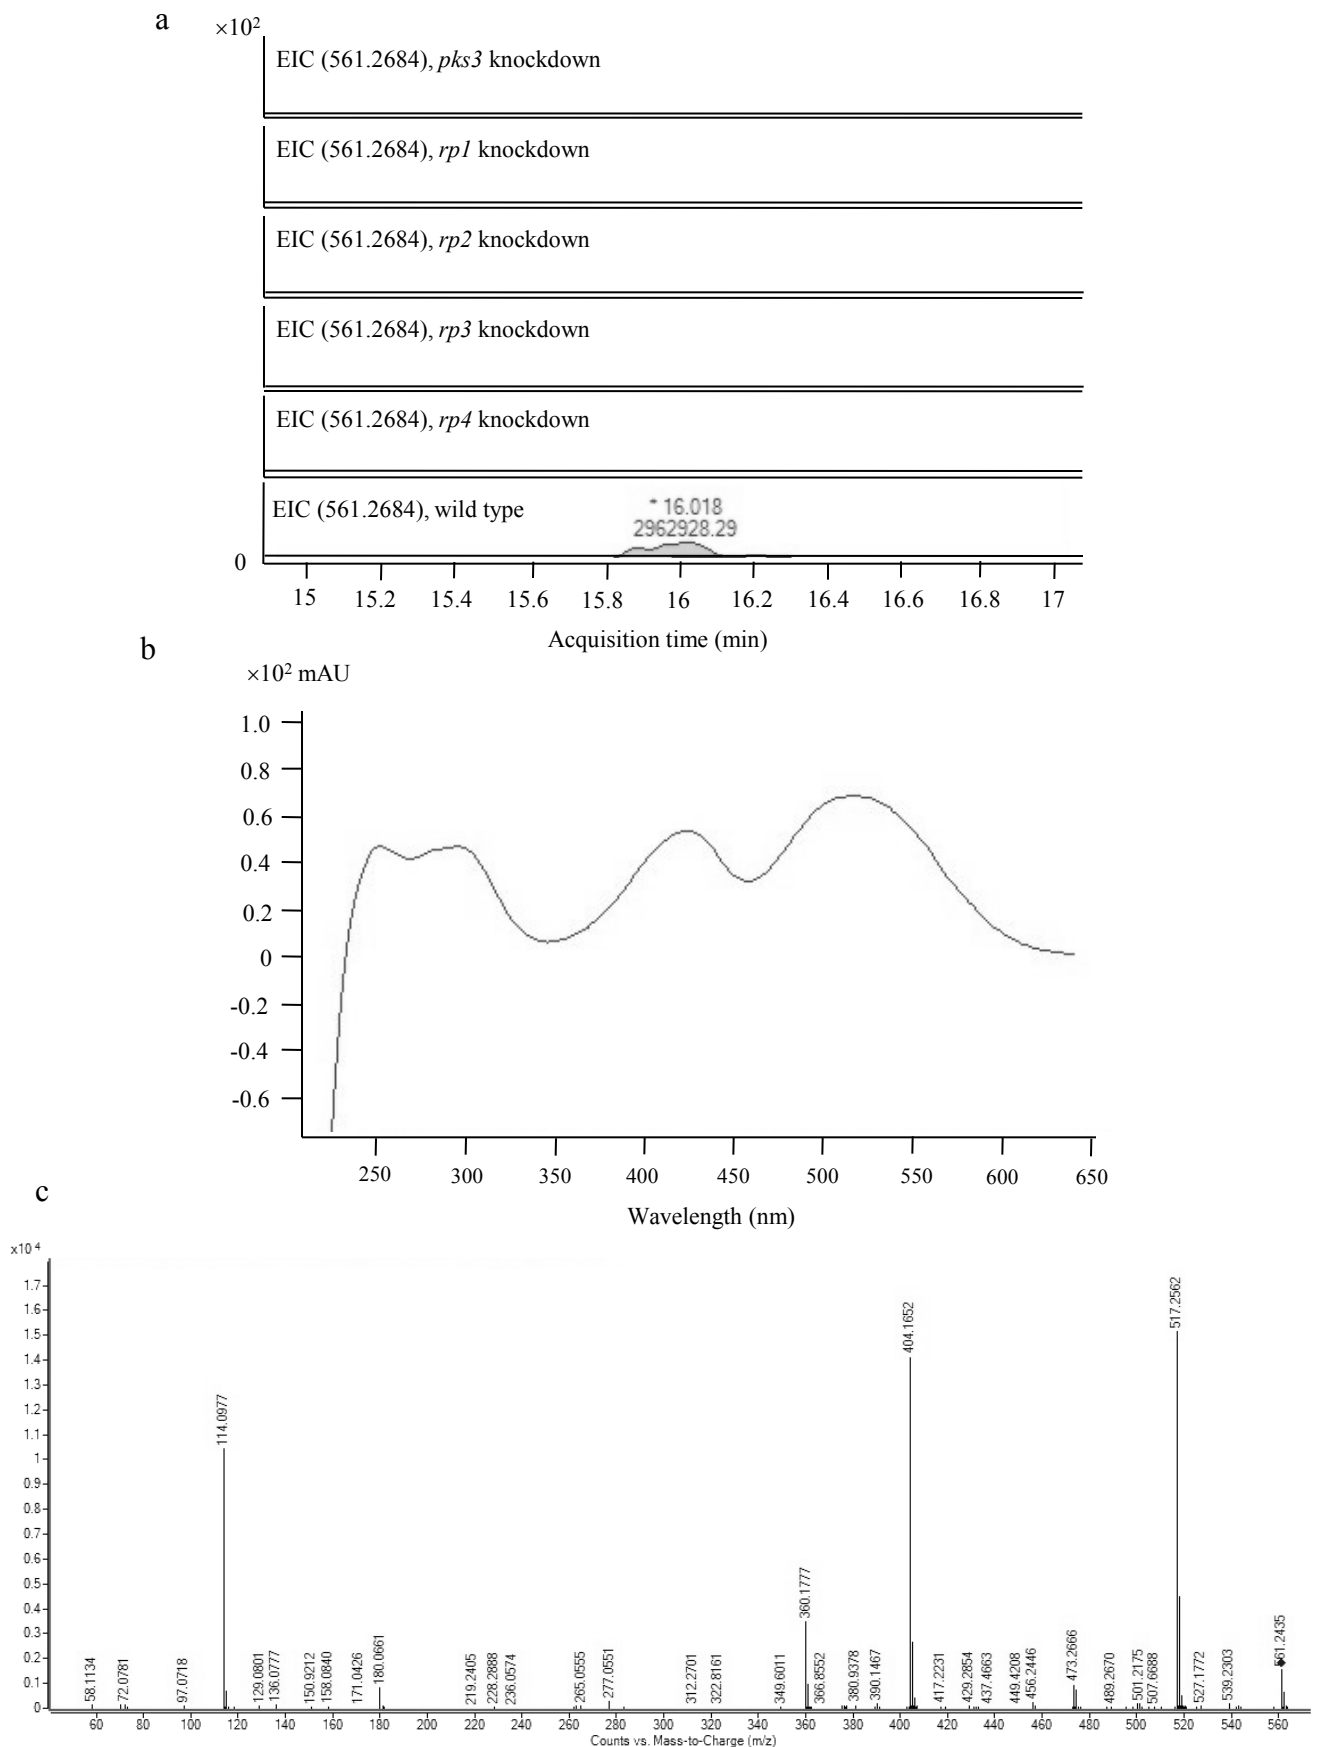

**Supplementary Figure S2: Detection of arginine conjugated with monascorubrin in *P. marneffei*.** (a) Extracted ion chromatogram, (b) UV absorption spectrum and (c) MS/MS fragmentation pattern showing the presence of arginine-monascorubrin conjugate detected in wild type *P. marneffei* but not in *pks3* or *rp1* to *rp4* knockdown mutants.

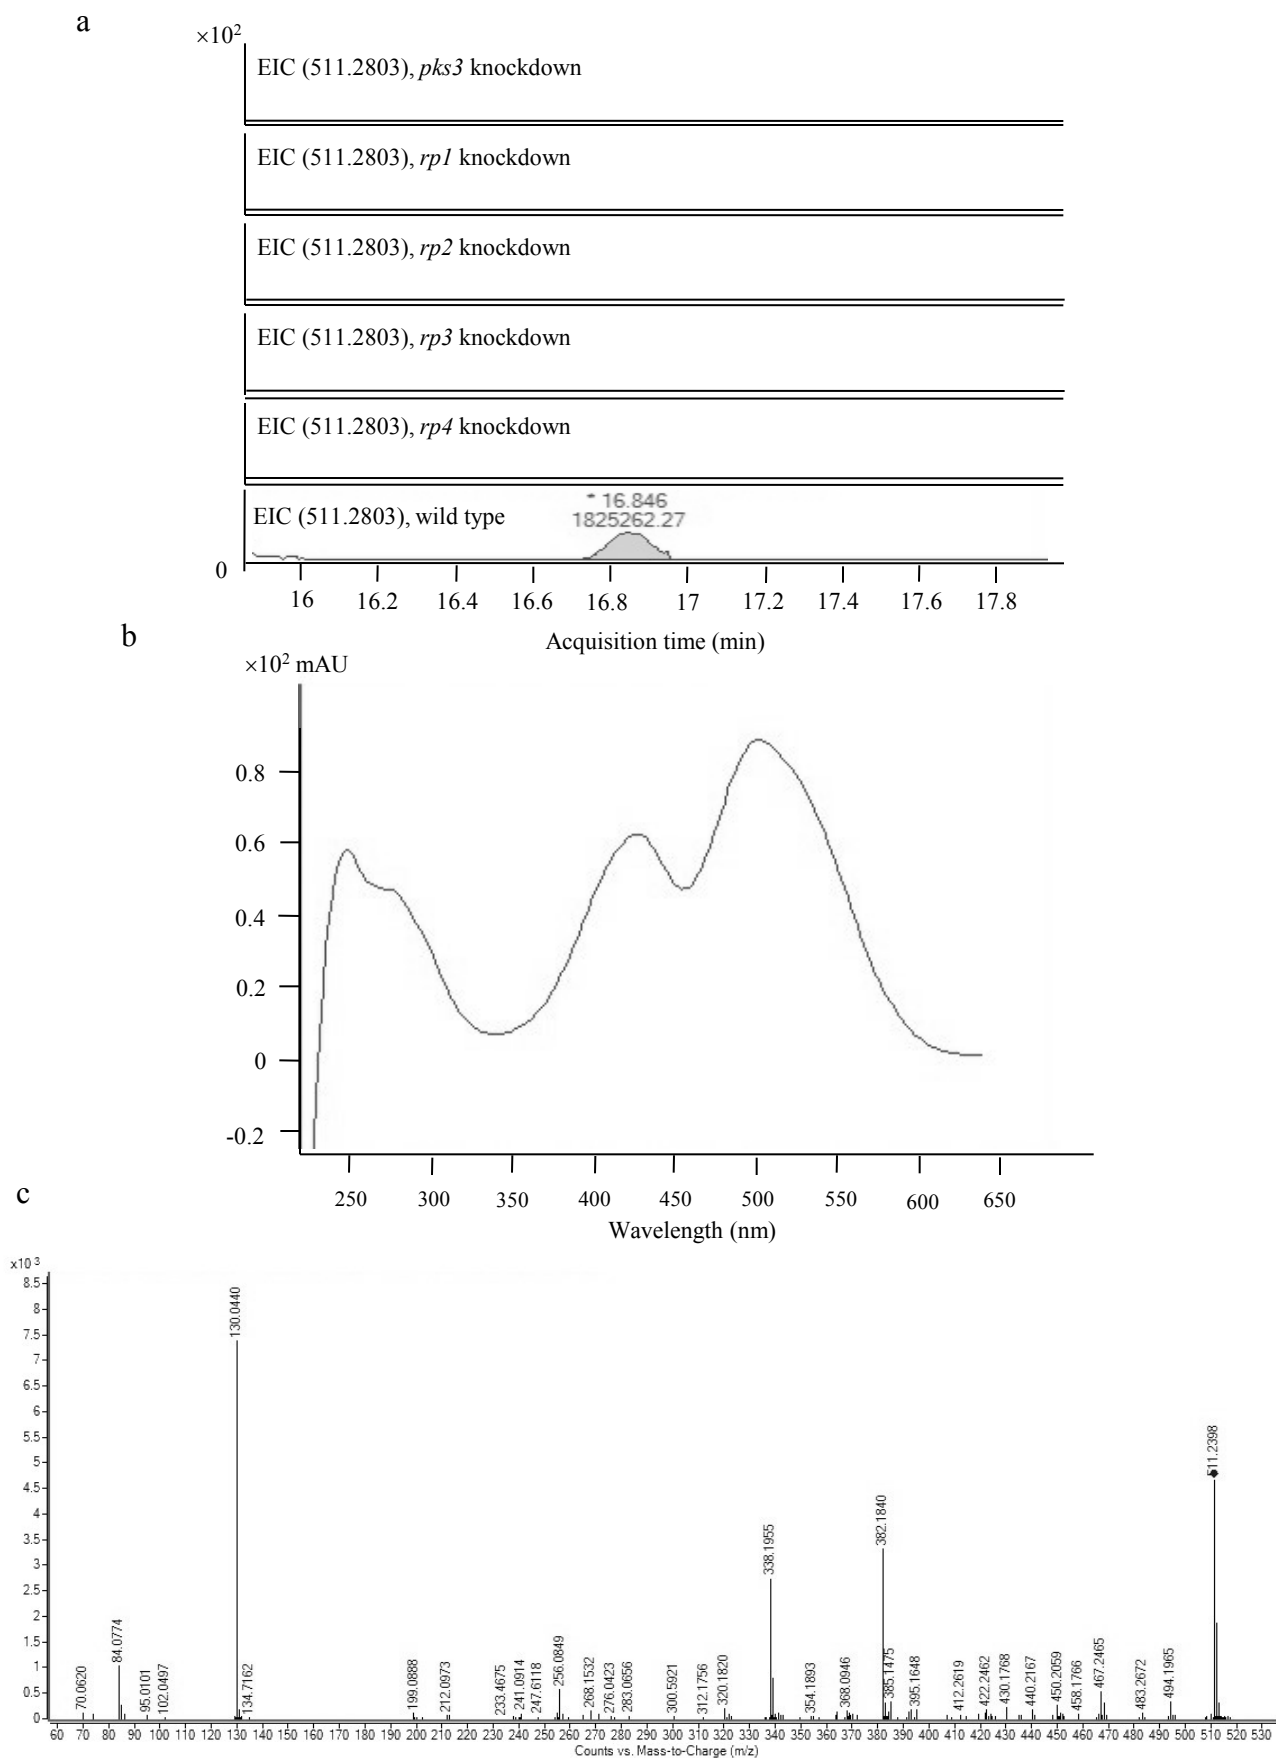

**Supplementary Figure S3: Detection of lysine conjugated with monascorubrin in *P. marneffei*.** (a) Extracted ion chromatogram, (b) UV absorption spectrum and (c) MS/MS fragmentation pattern showing the presence of lysine-monascorubrin conjugate detected in wild type *P. marneffei* but not in *pks3* or *rp1* to *rp4* knockdown mutants.

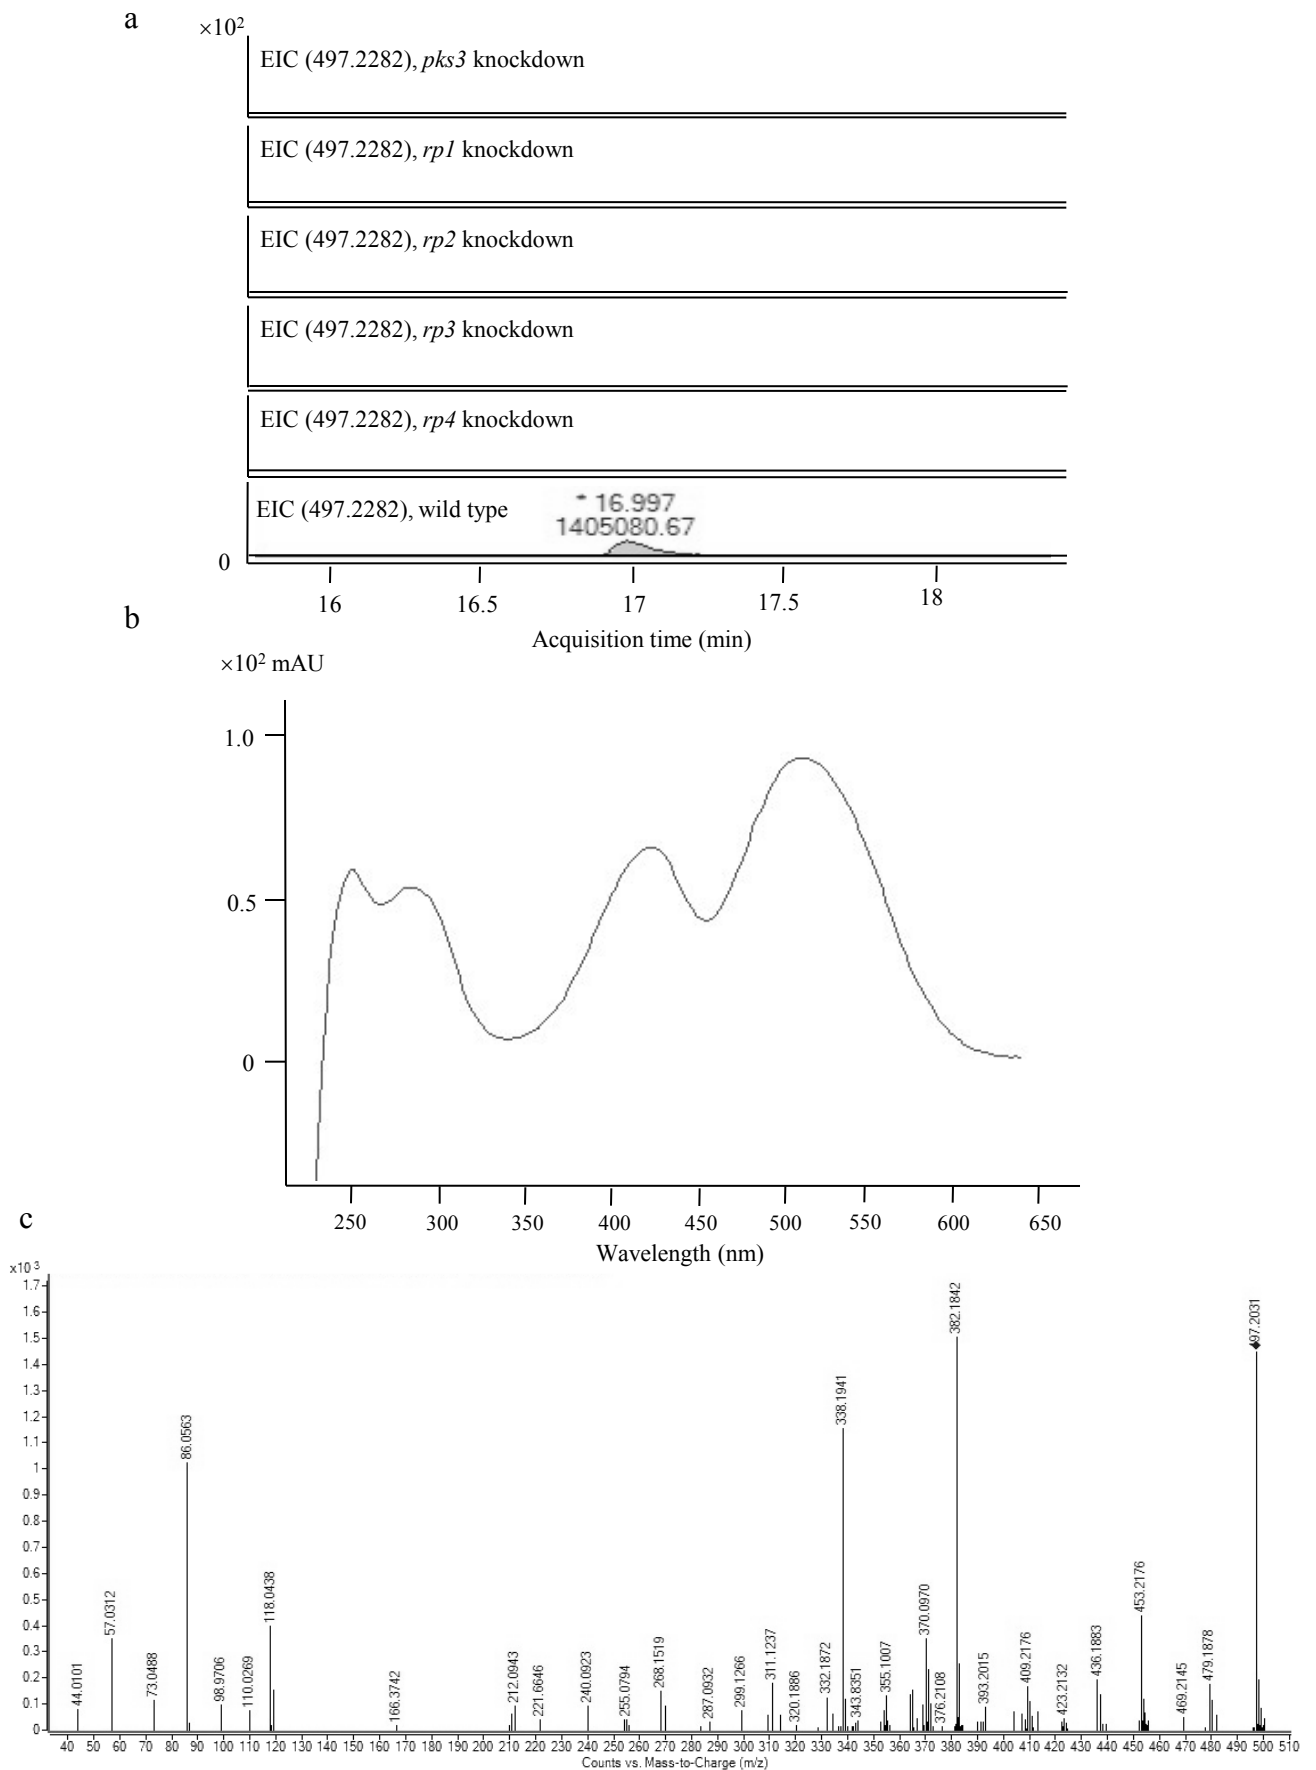

**Supplementary Figure S4: Detection of asparagine conjugated with monascorubrin in *P. marneffei*.** (a) Extracted ion chromatogram, (b) UV absorption spectrum and (c) MS/MS fragmentation pattern showing the presence of asparagine-monascorubrin conjugate detected in wild type *P. marneffei* but not in *pks3* or *rp1* to *rp4* knockdown mutants.

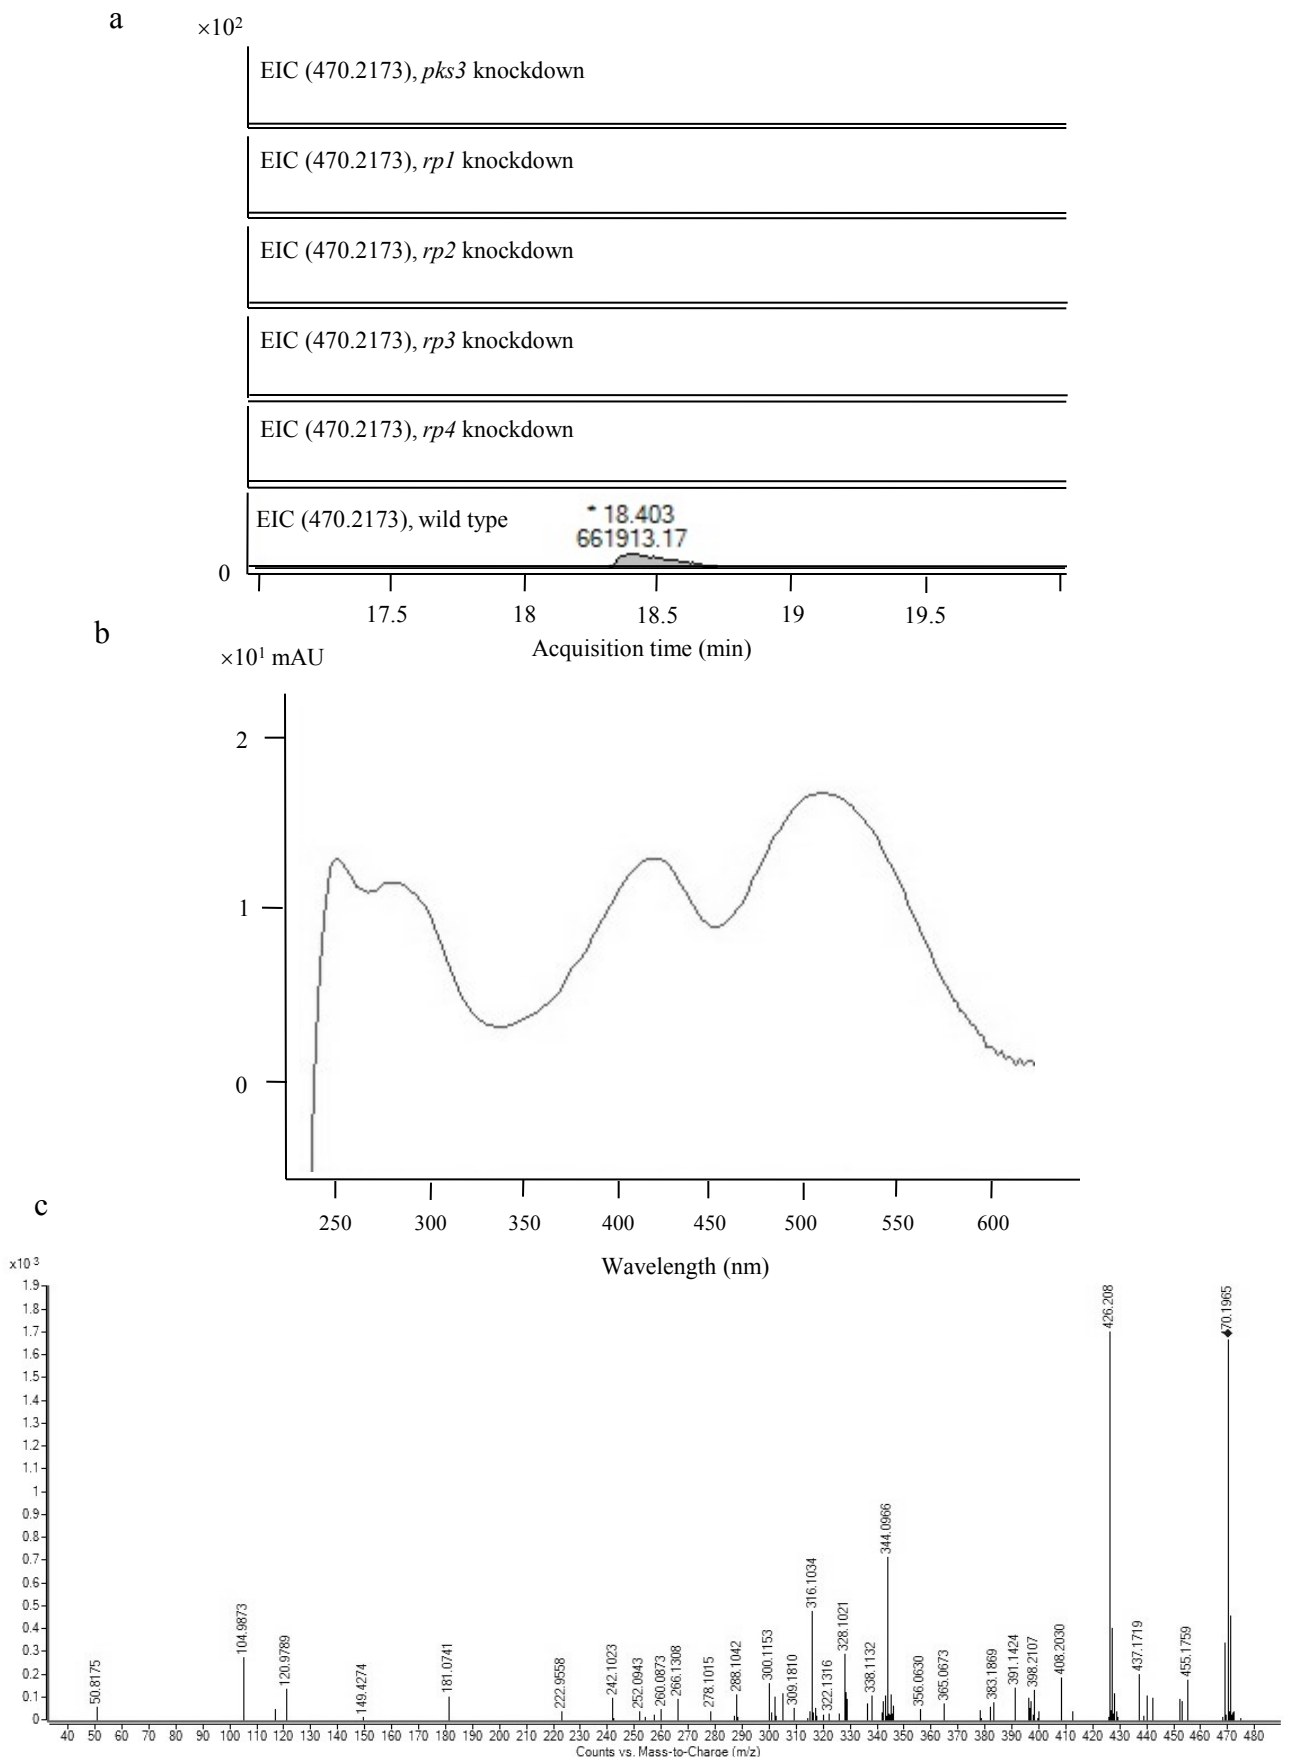

**Supplementary Figure S5: Detection of serine conjugated with monascorubrin in *P. marneffei*.** (a) Extracted ion chromatogram, (b) UV absorption spectrum and (c) MS/MS fragmentation pattern showing the presence of serine-monascorubrin conjugate detected in wild type *P. marneffei* but not in *pks3* or *rp1* to *rp4* knockdown mutants.

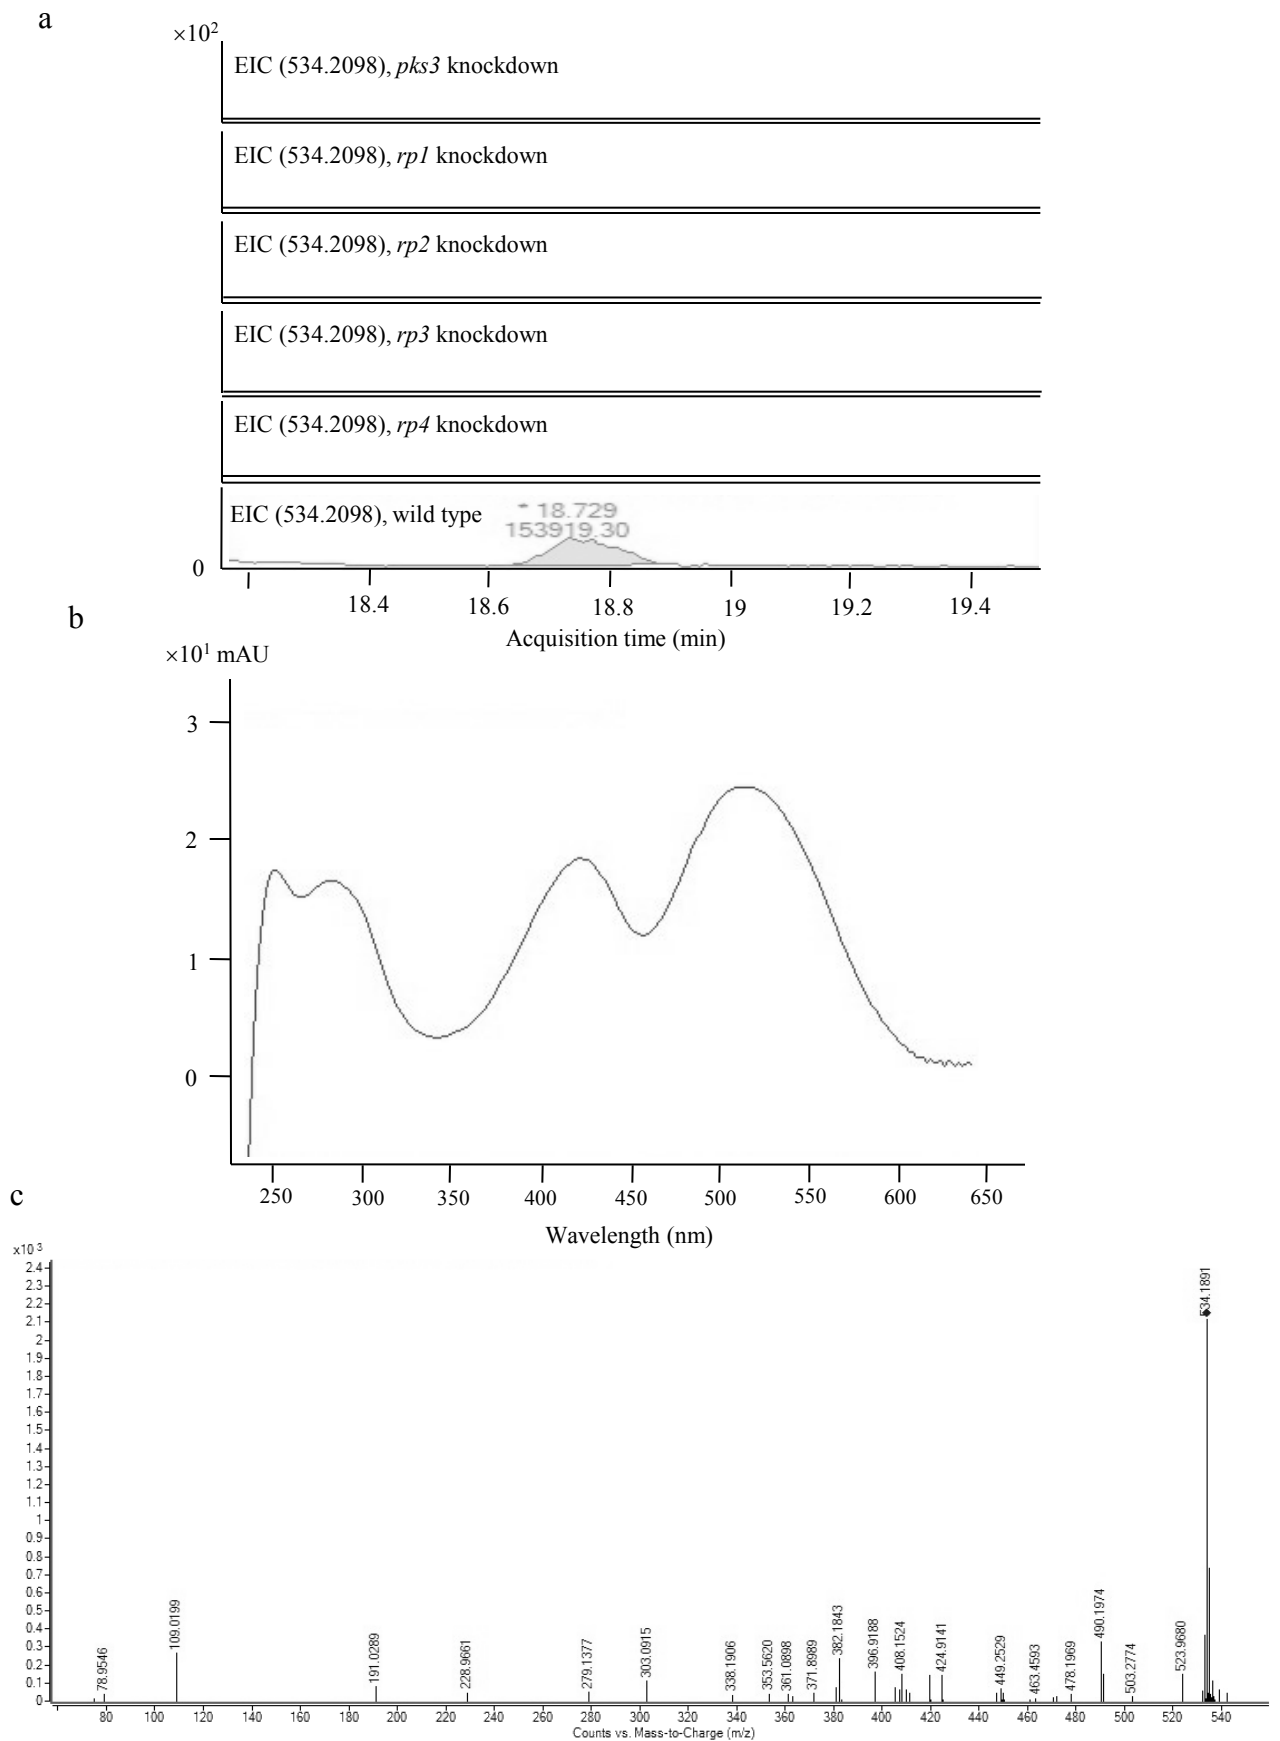

**Supplementary Figure S6: Detection of glutamic acid conjugated with monascorubrin in *P. marneffei*.** (a) Extracted ion chromatogram, (b) UV absorption spectrum and (c) MS/MS fragmentation pattern showing the presence of glutamic-monascorubrin conjugate detected in wild type *P. marneffei* but not in *pks3* or *rp1* to *rp4* knockdown mutants.

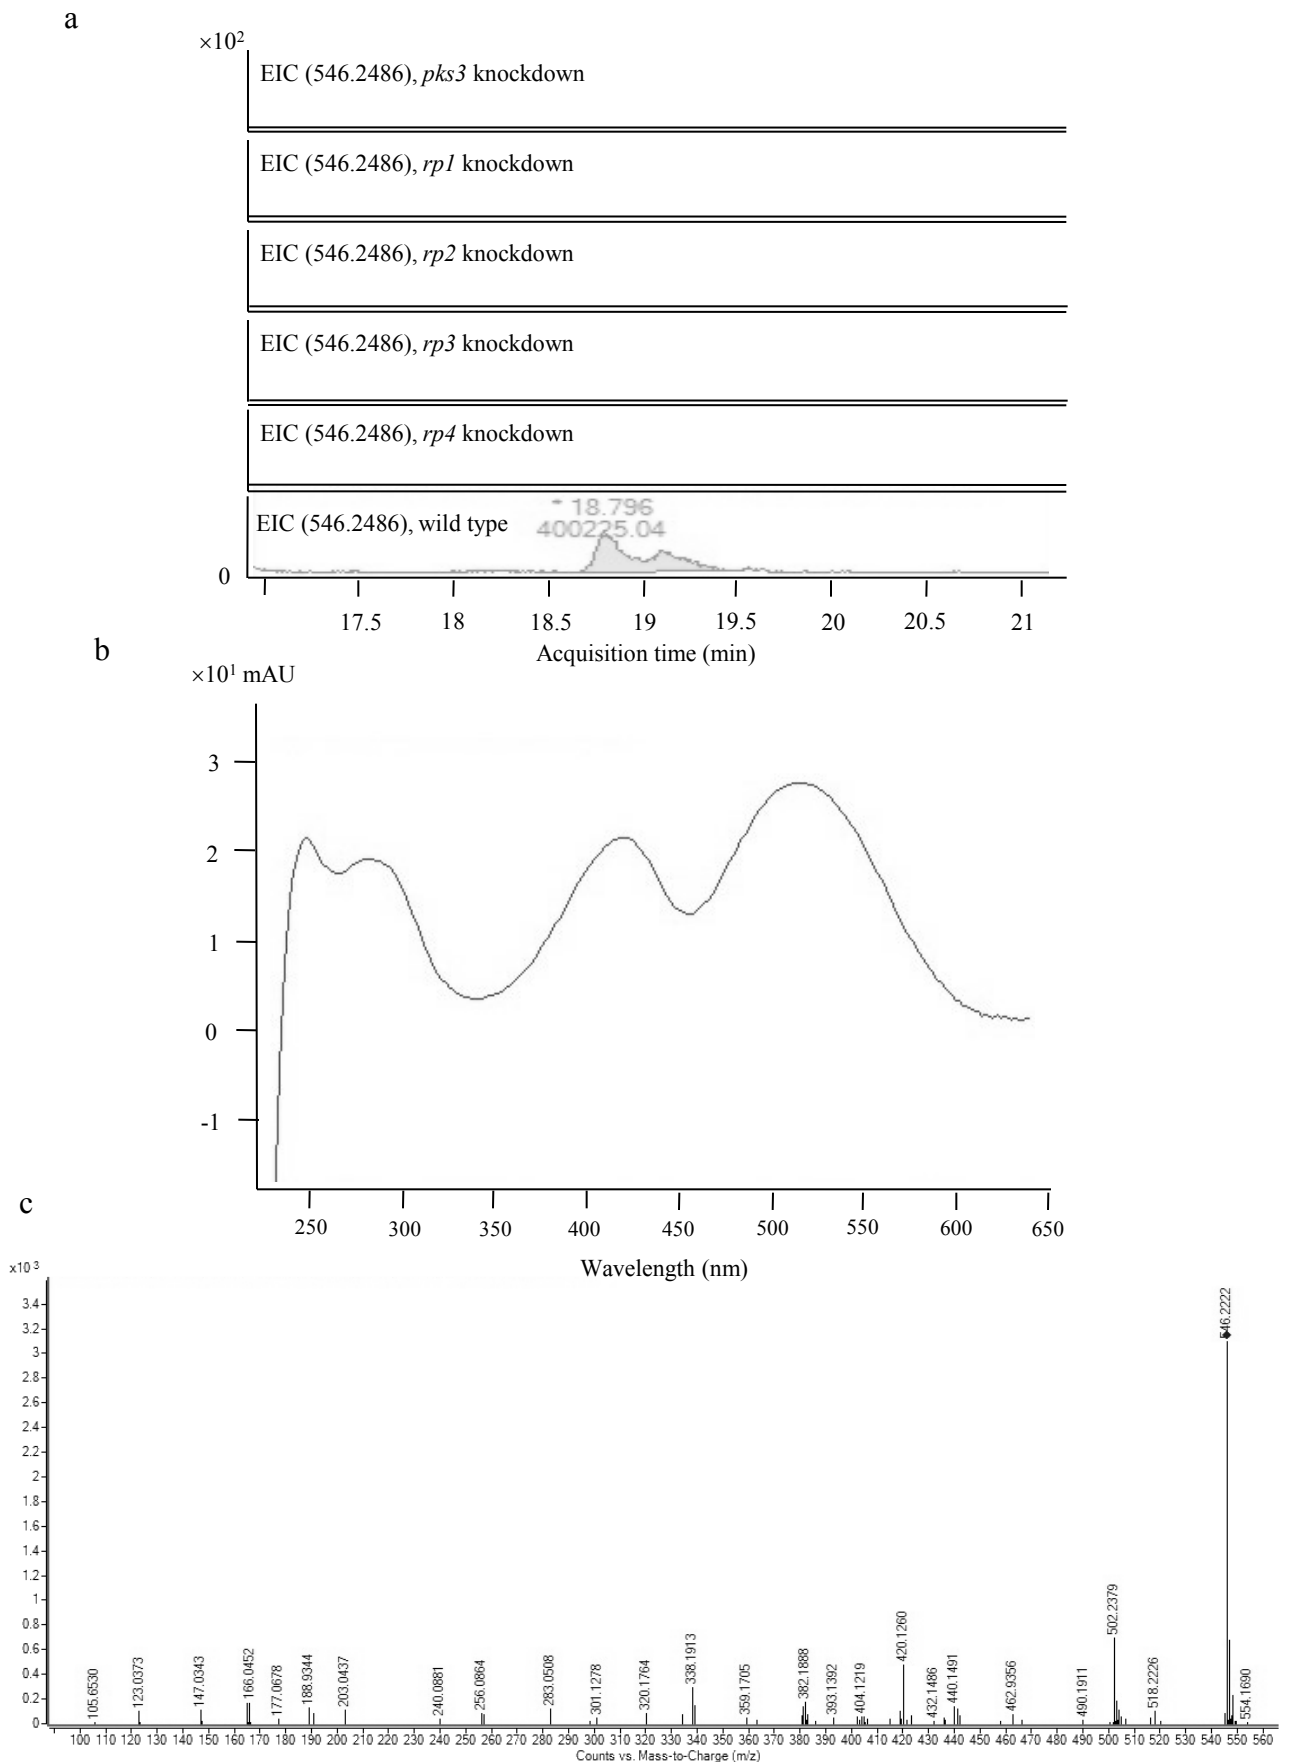

**Supplementary Figure S7: Detection of tyrosine conjugated with monascorubrin in *P. marneffei*.** (a) Extracted ion chromatogram, (b) UV absorption spectrum and (c) MS/MS fragmentation pattern showing the presence of tyrosine-monascorubrin conjugate detected in wild type *P. marneffei* but not in *pks3* or *rp1* to *rp4* knockdown mutants.



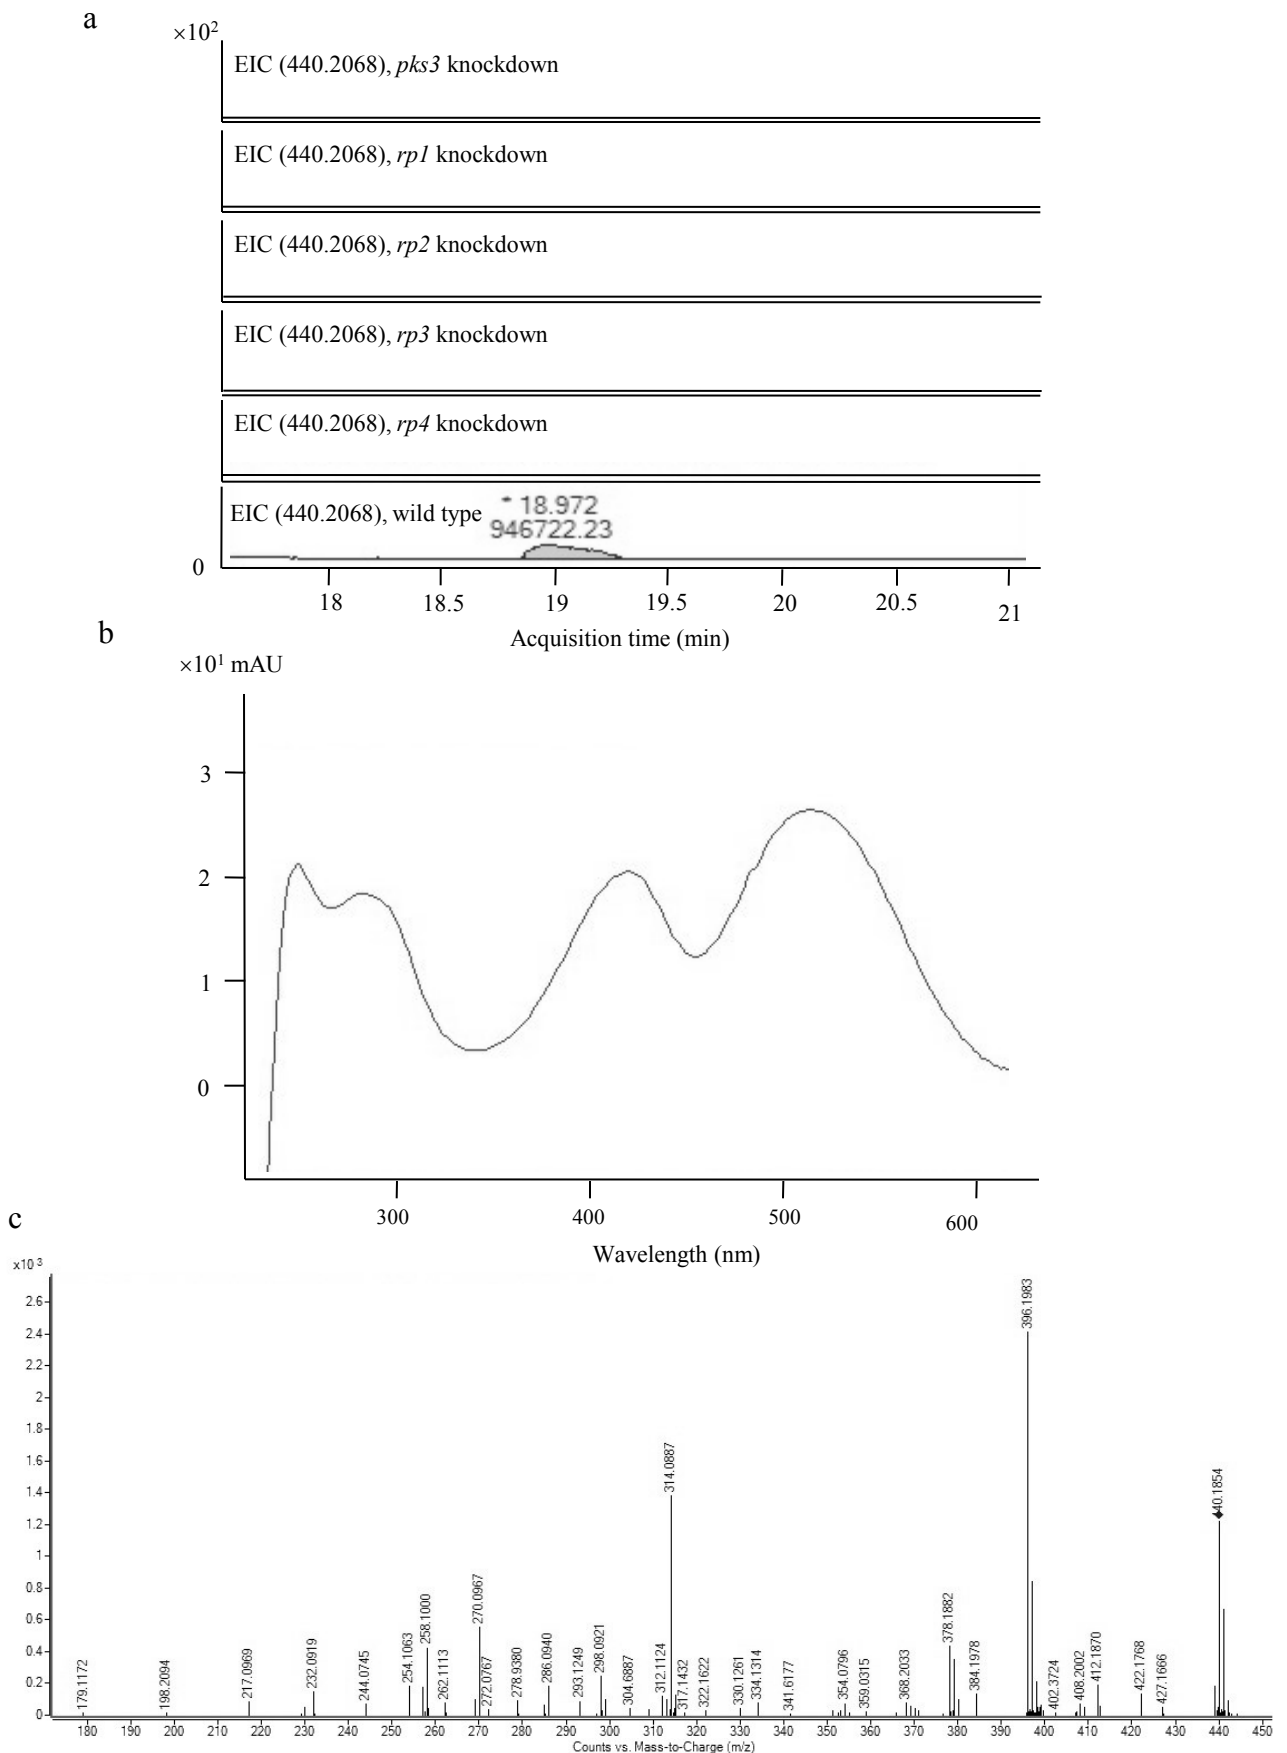

**Supplementary Figure S8: Detection of glycine conjugated with monascorubrin in *P. marneffei*.** (a) Extracted ion chromatogram, (b) UV absorption spectrum and (c) MS/MS fragmentation pattern showing the presence of glycine-monascorubrin conjugate detected in wild type *P. marneffei* but not in *pks3* or *rp1* to *rp4* knockdown mutants.

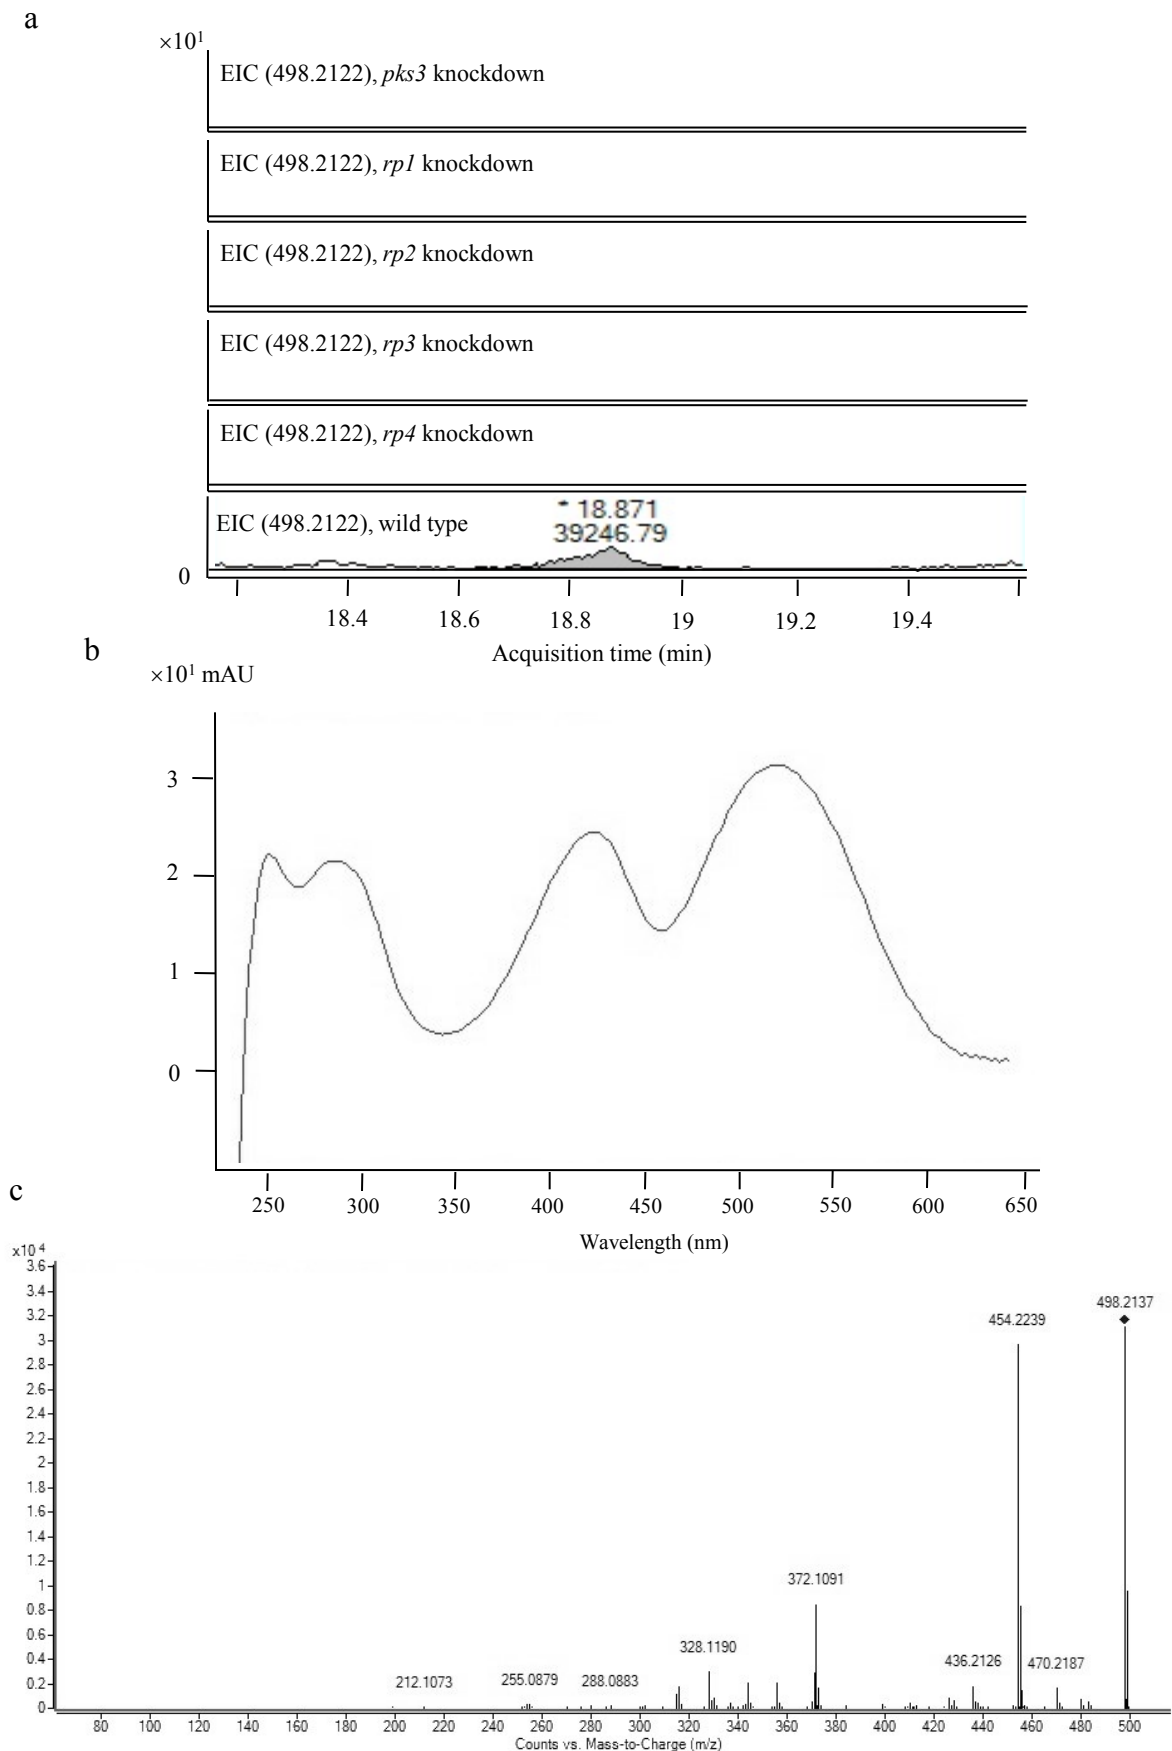

**Supplementary Figure S9: Detection of aspartic acid conjugated with monascorubrin in *P. marneffei*.** (a) Extracted ion chromatogram, (b) UV absorption spectrum and (c) MS/MS fragmentation pattern showing the presence of aspartic acid-monascorubrin conjugate detected in wild type *P. marneffei* but not in *pks3* or *rp1* to *rp4* knockdown mutants.

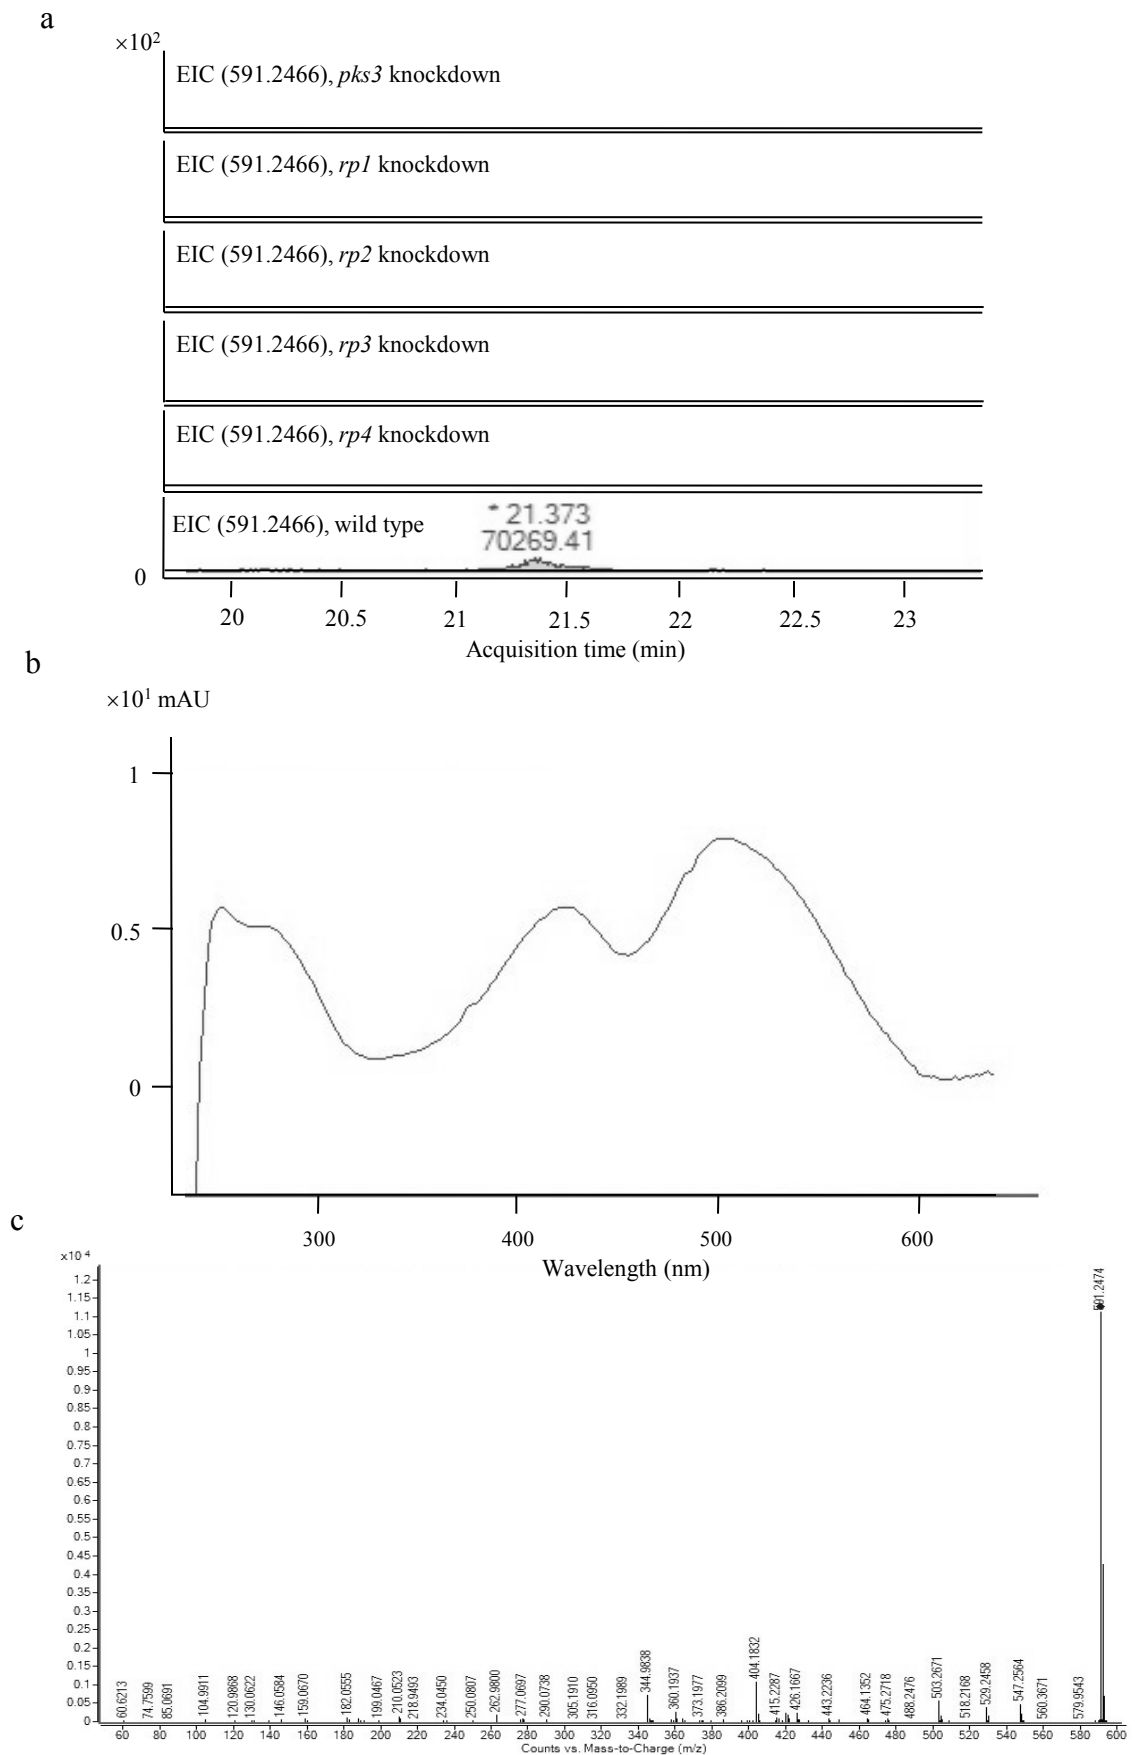

**Supplementary Figure S10: Detection of tryptophan conjugated with monascorubrin in *P. marneffei*.** (a) Extracted ion chromatogram, (b) UV absorption spectrum and (c) MS/MS fragmentation pattern showing the presence of tryptophan-monascorubrin conjugate detected in wild type *P. marneffei* but not in *pks3* or *rp1* to *rp4* knockdown mutants.

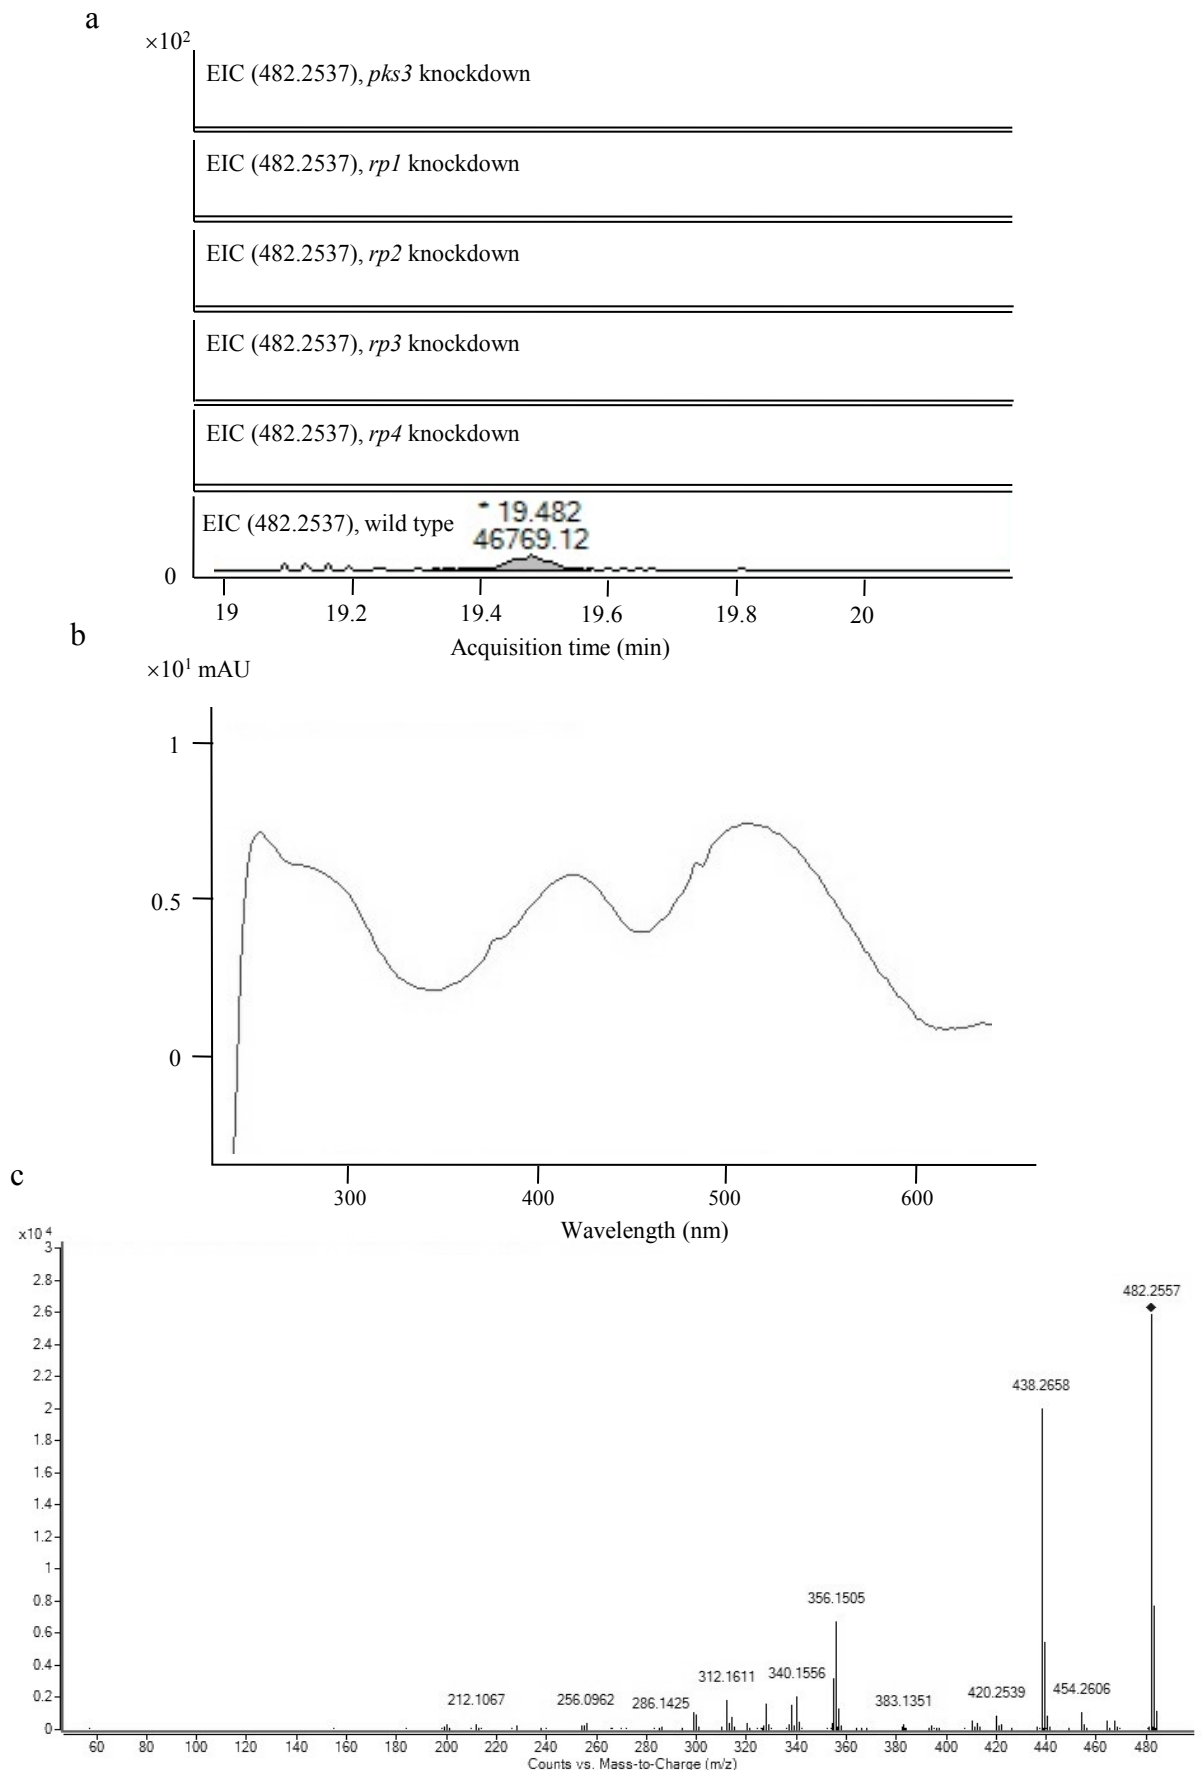

**Supplementary Figure S11: Detection of valine conjugated with monascorubrin in *P. marneffei*.** (a) Extracted ion chromatogram, (b) UV absorption spectrum and (c) MS/MS fragmentation pattern showing the presence of valine-monascorubrin conjugate detected in wild type *P. marneffei* but not in *pks3* or *rp1* to *rp4* knockdown mutants.

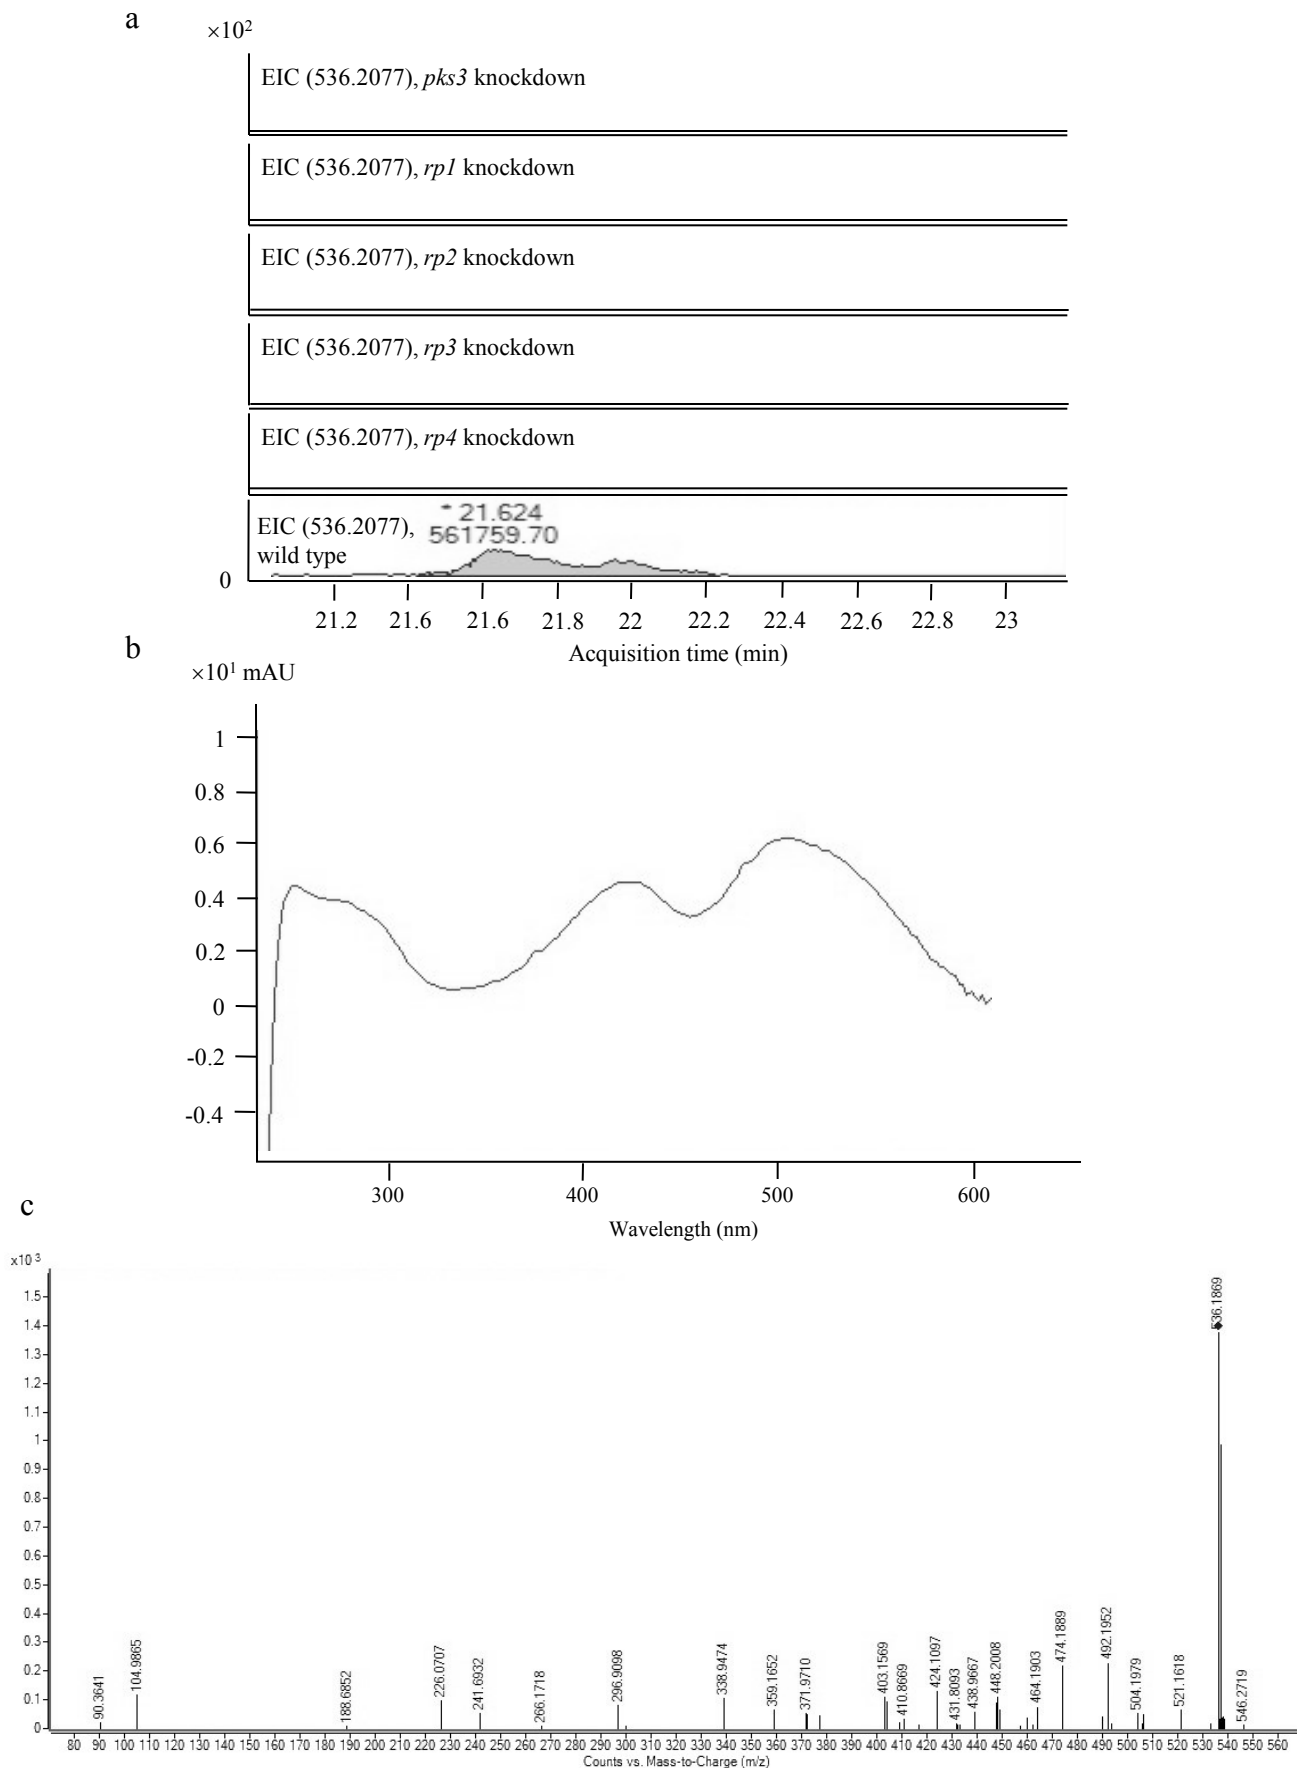

**Supplementary Figure S12: Detection of methionine conjugated with monascorubrin in *P. marneffei*.** (a) Extracted ion chromatogram, (b) UV absorption spectrum and (c) MS/MS fragmentation pattern showing the presence of methionine-monascorubrin conjugate detected in wild type *P. marneffei* but not in *pks3* or *rp1* to *rp4* knockdown mutants.

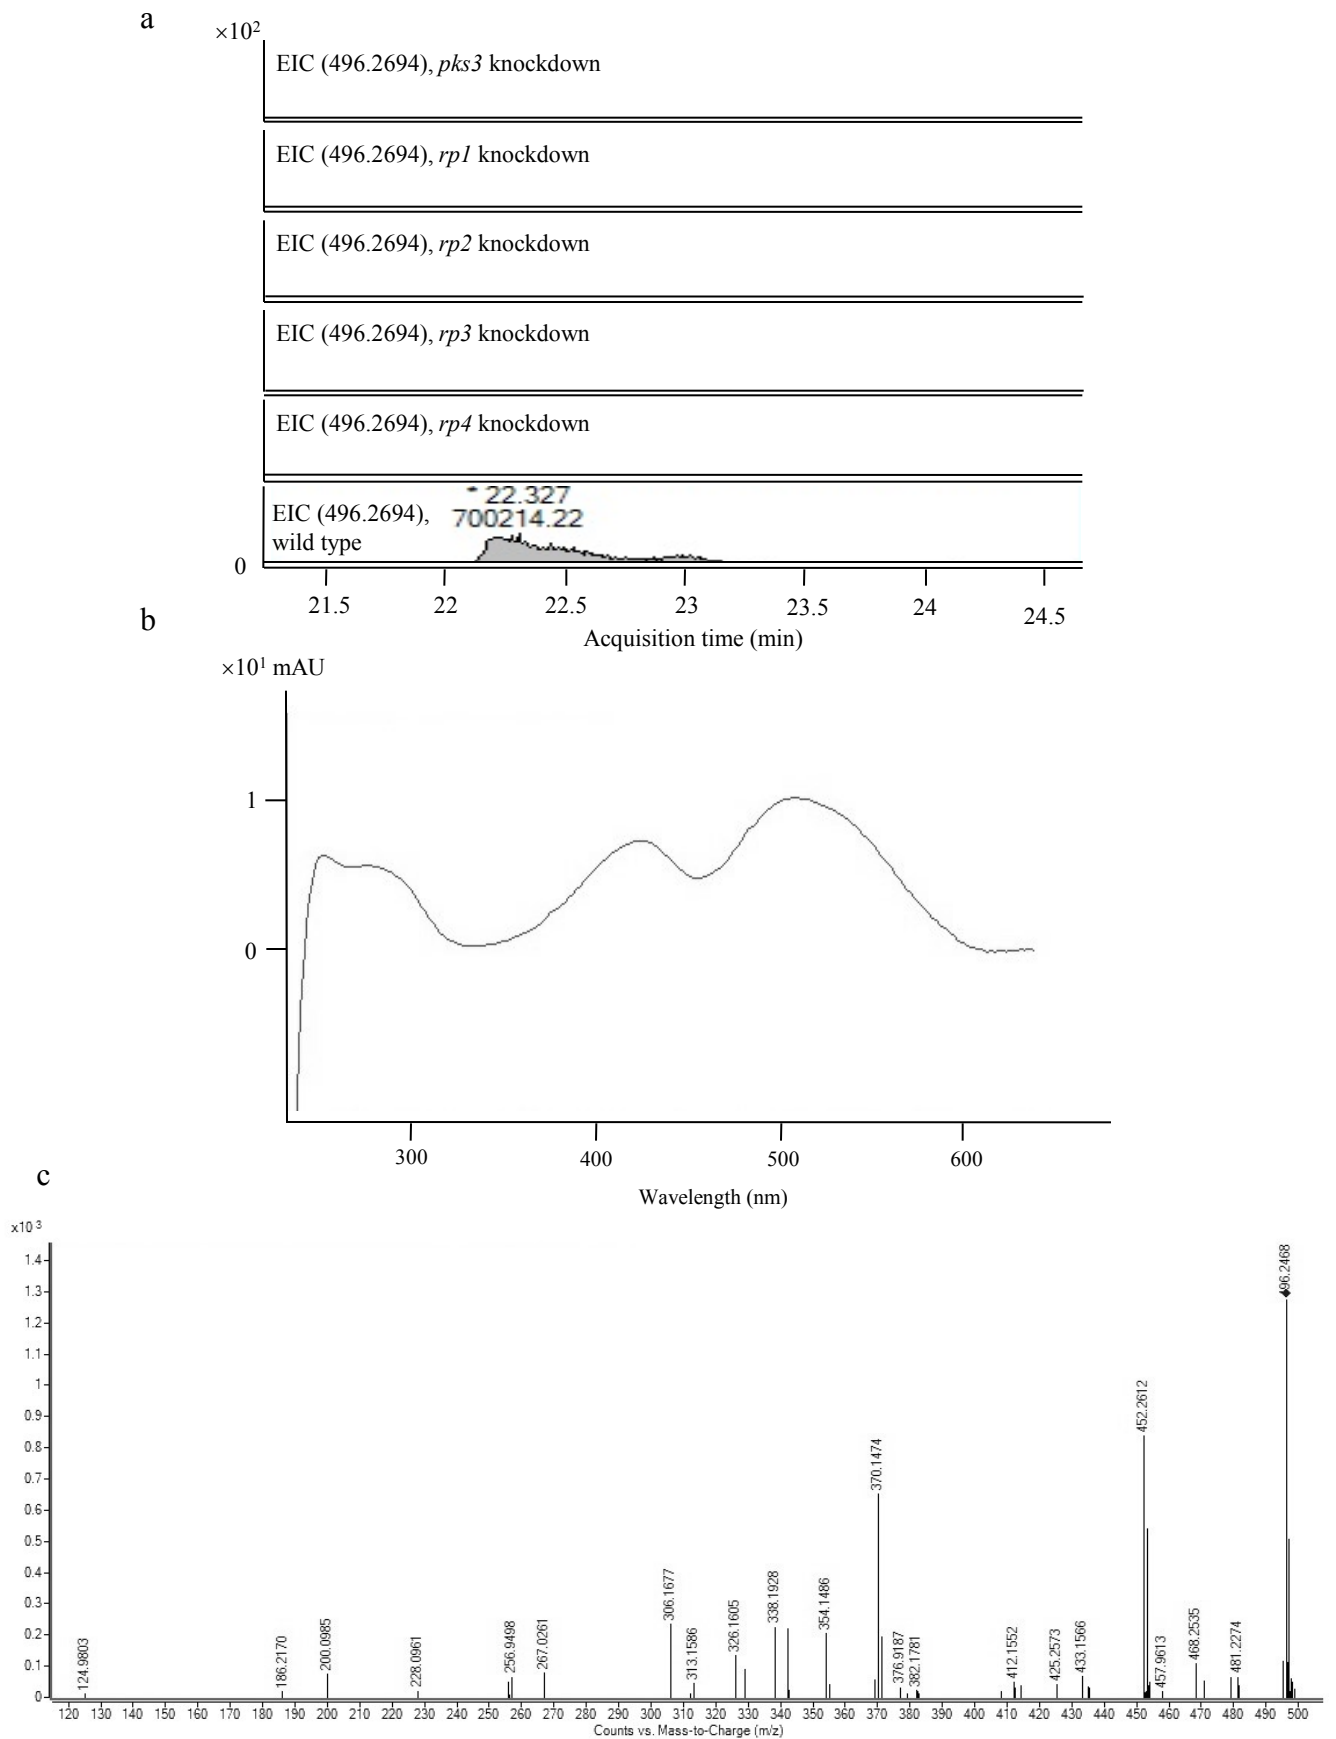

**Supplementary Figure S13: Detection of leucine conjugated with monascorubrin in *P. marneffei*.** (a) Extracted ion chromatogram, (b) UV absorption spectrum and (c) MS/MS fragmentation pattern showing the presence of leucine-monascorubrin conjugate detected in wild type *P. marneffei* but not in *pks3* or *rp1* to *rp4* knockdown mutants.

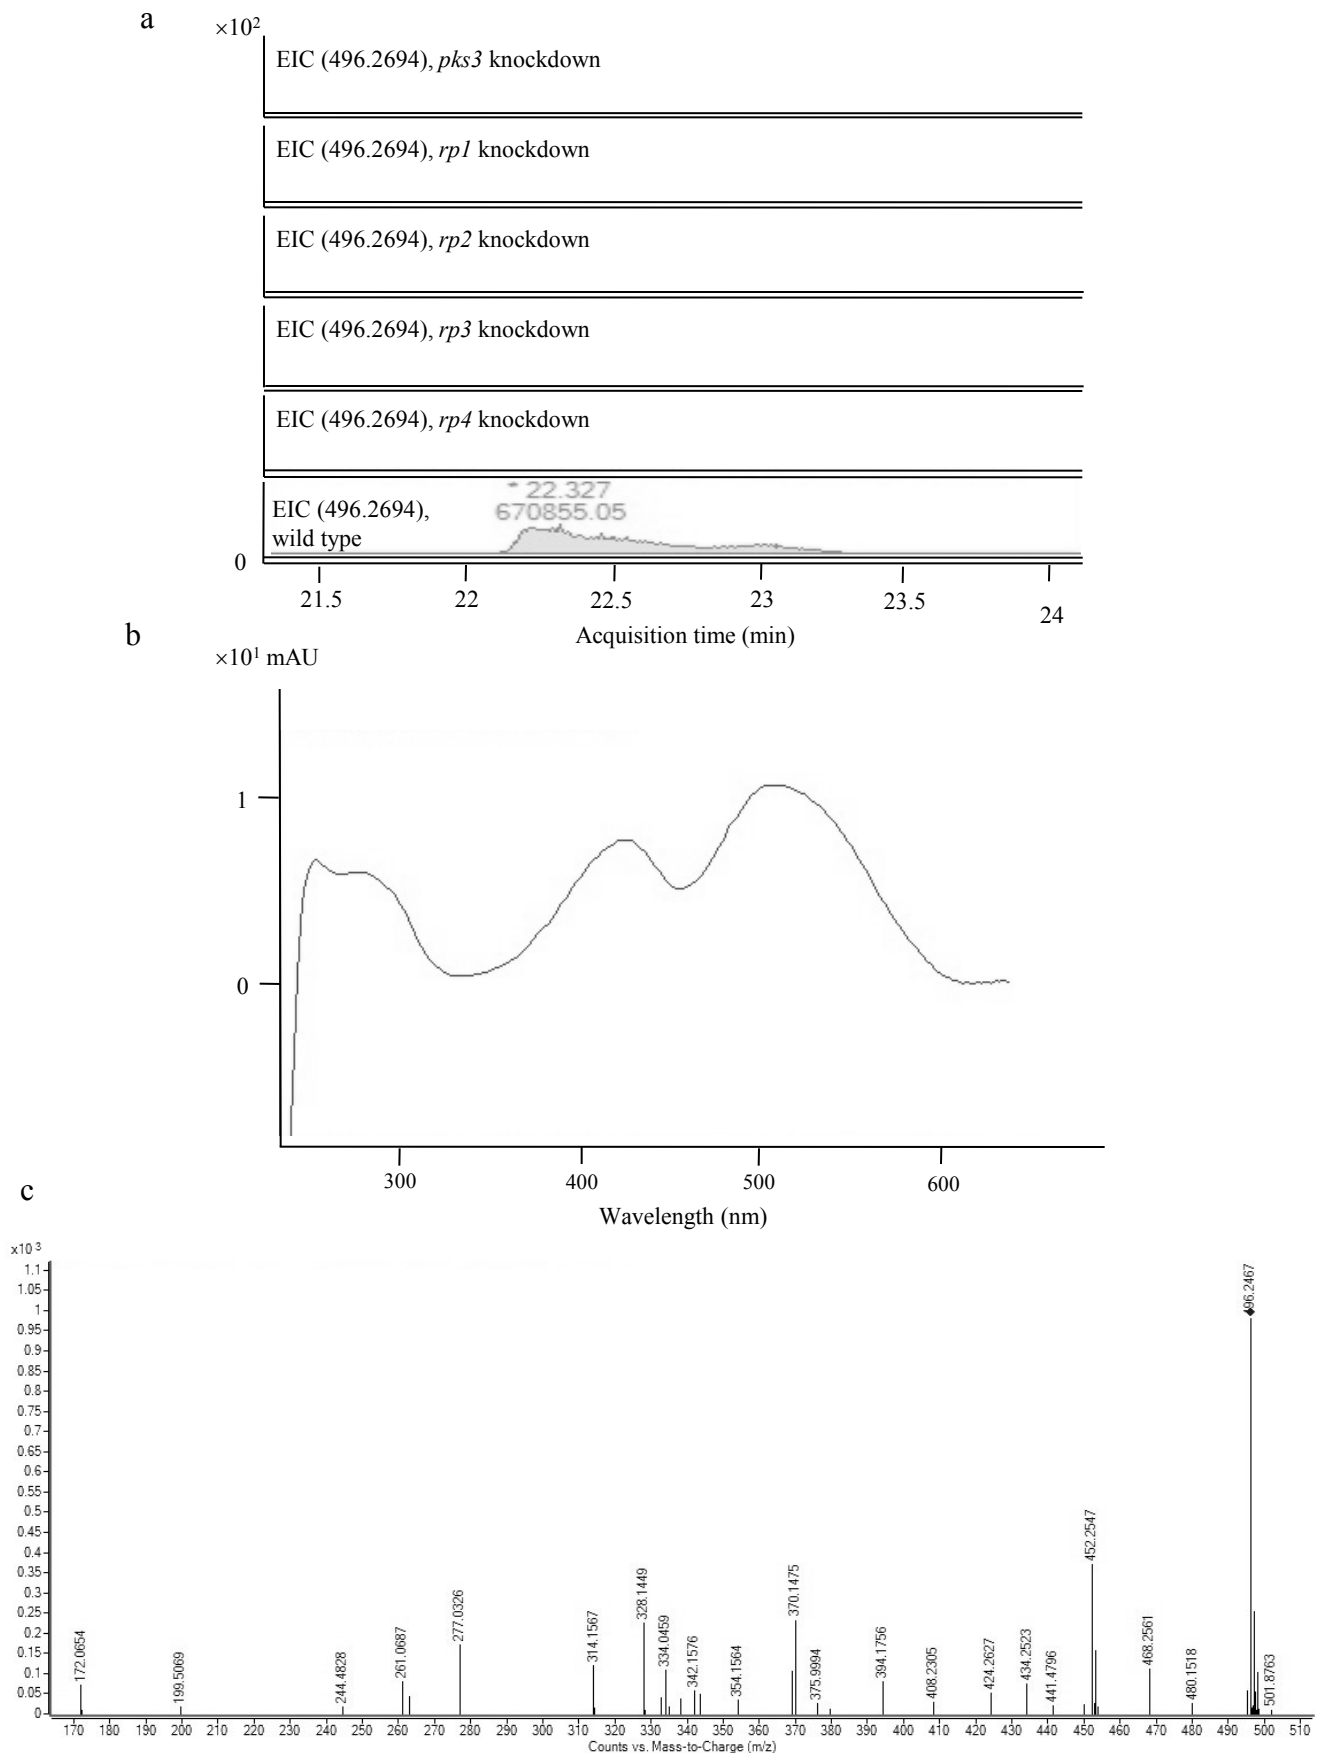

**Supplementary Figure S14: Detection of isoleucine conjugated with monascorubrin in *P. marneffei*.** (a) Extracted ion chromatogram, (b) UV absorption spectrum and (c) MS/MS fragmentation pattern showing the presence of isoleucine-monascorubrin conjugate detected in wild type *P. marneffei* but not in *pks3* or *rp1* to *rp4* knockdown mutants.

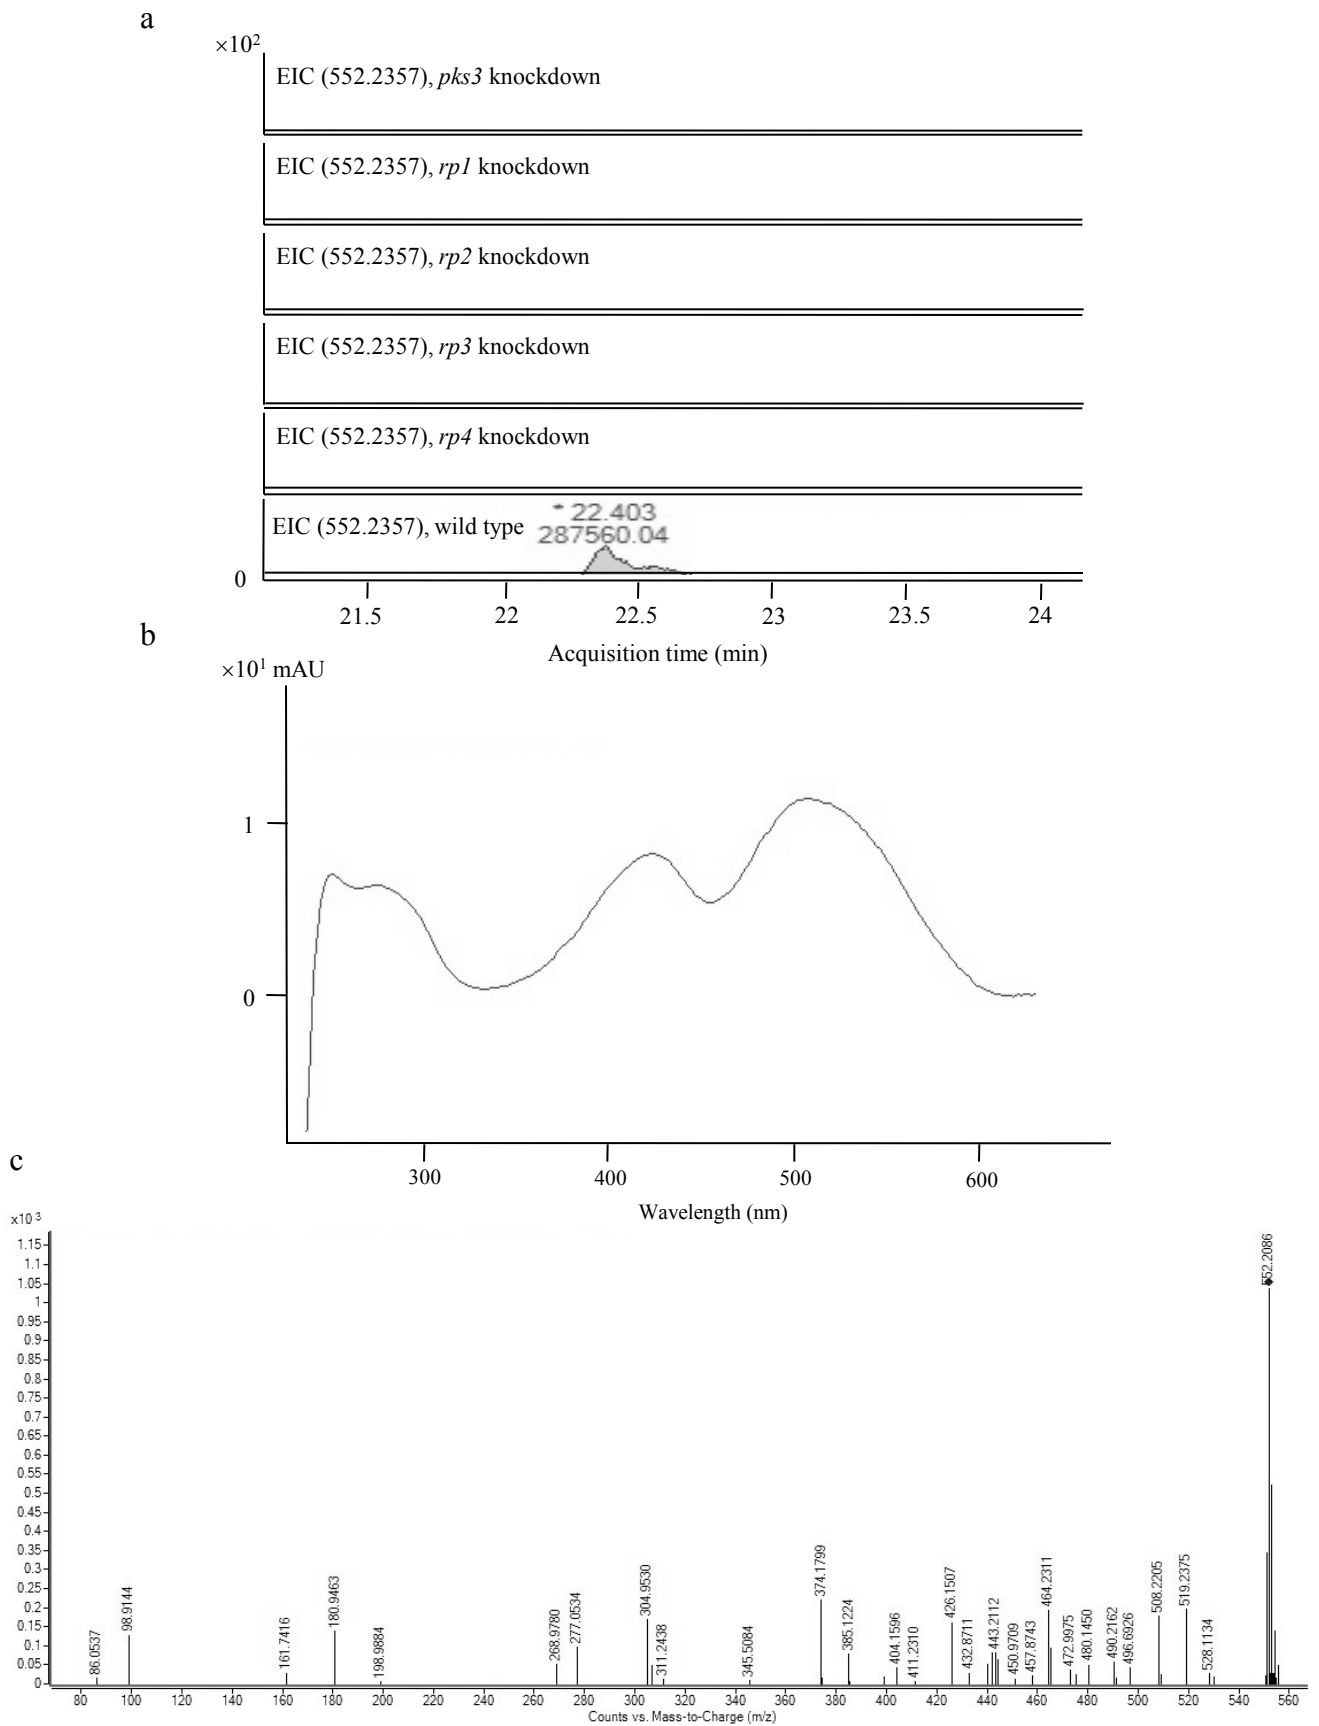

**Supplementary Figure S15: Detection of phenylalanine conjugated with monascorubrin in *P. marneffei*.** (a) Extracted ion chromatogram, (b) UV absorption spectrum and (c) MS/MS fragmentation pattern showing the presence of phenylalanine-monascorubrin conjugate detected in wild type *P. marneffei* but not in *pks3* or *rp1* to *rp4* knockdown mutants.



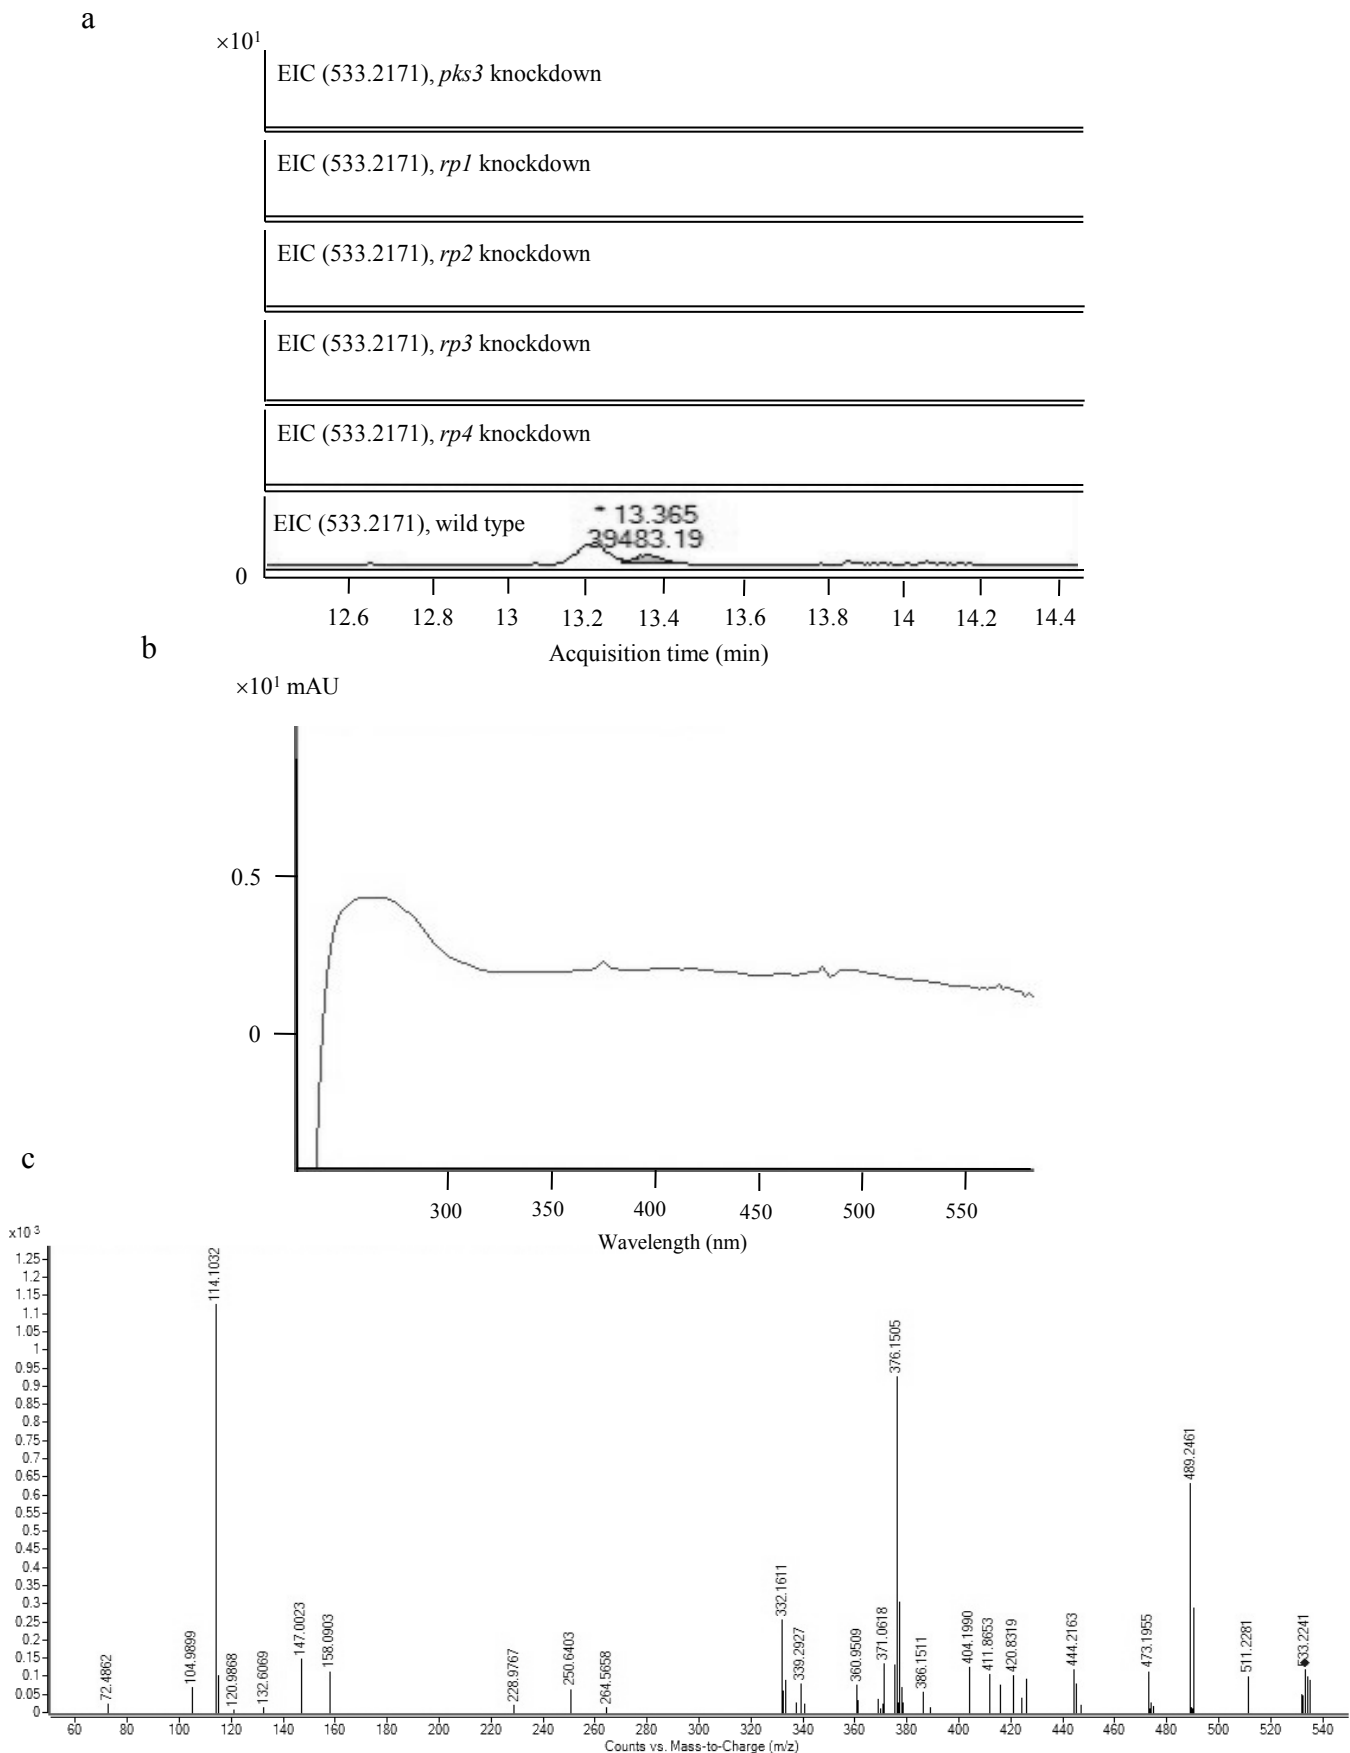

**Supplementary Figure S16: Detection of arginine conjugated with rubropunctatin in *P. marneffei*.** (a) Extracted ion chromatogram, (b) UV absorption spectrum and (c) MS/MS fragmentation pattern showing the presence of arginine-rubropunctatin conjugate detected in wild type *P. marneffei* but not in *pks3* or *rp1* to *rp4* knockdown mutants.

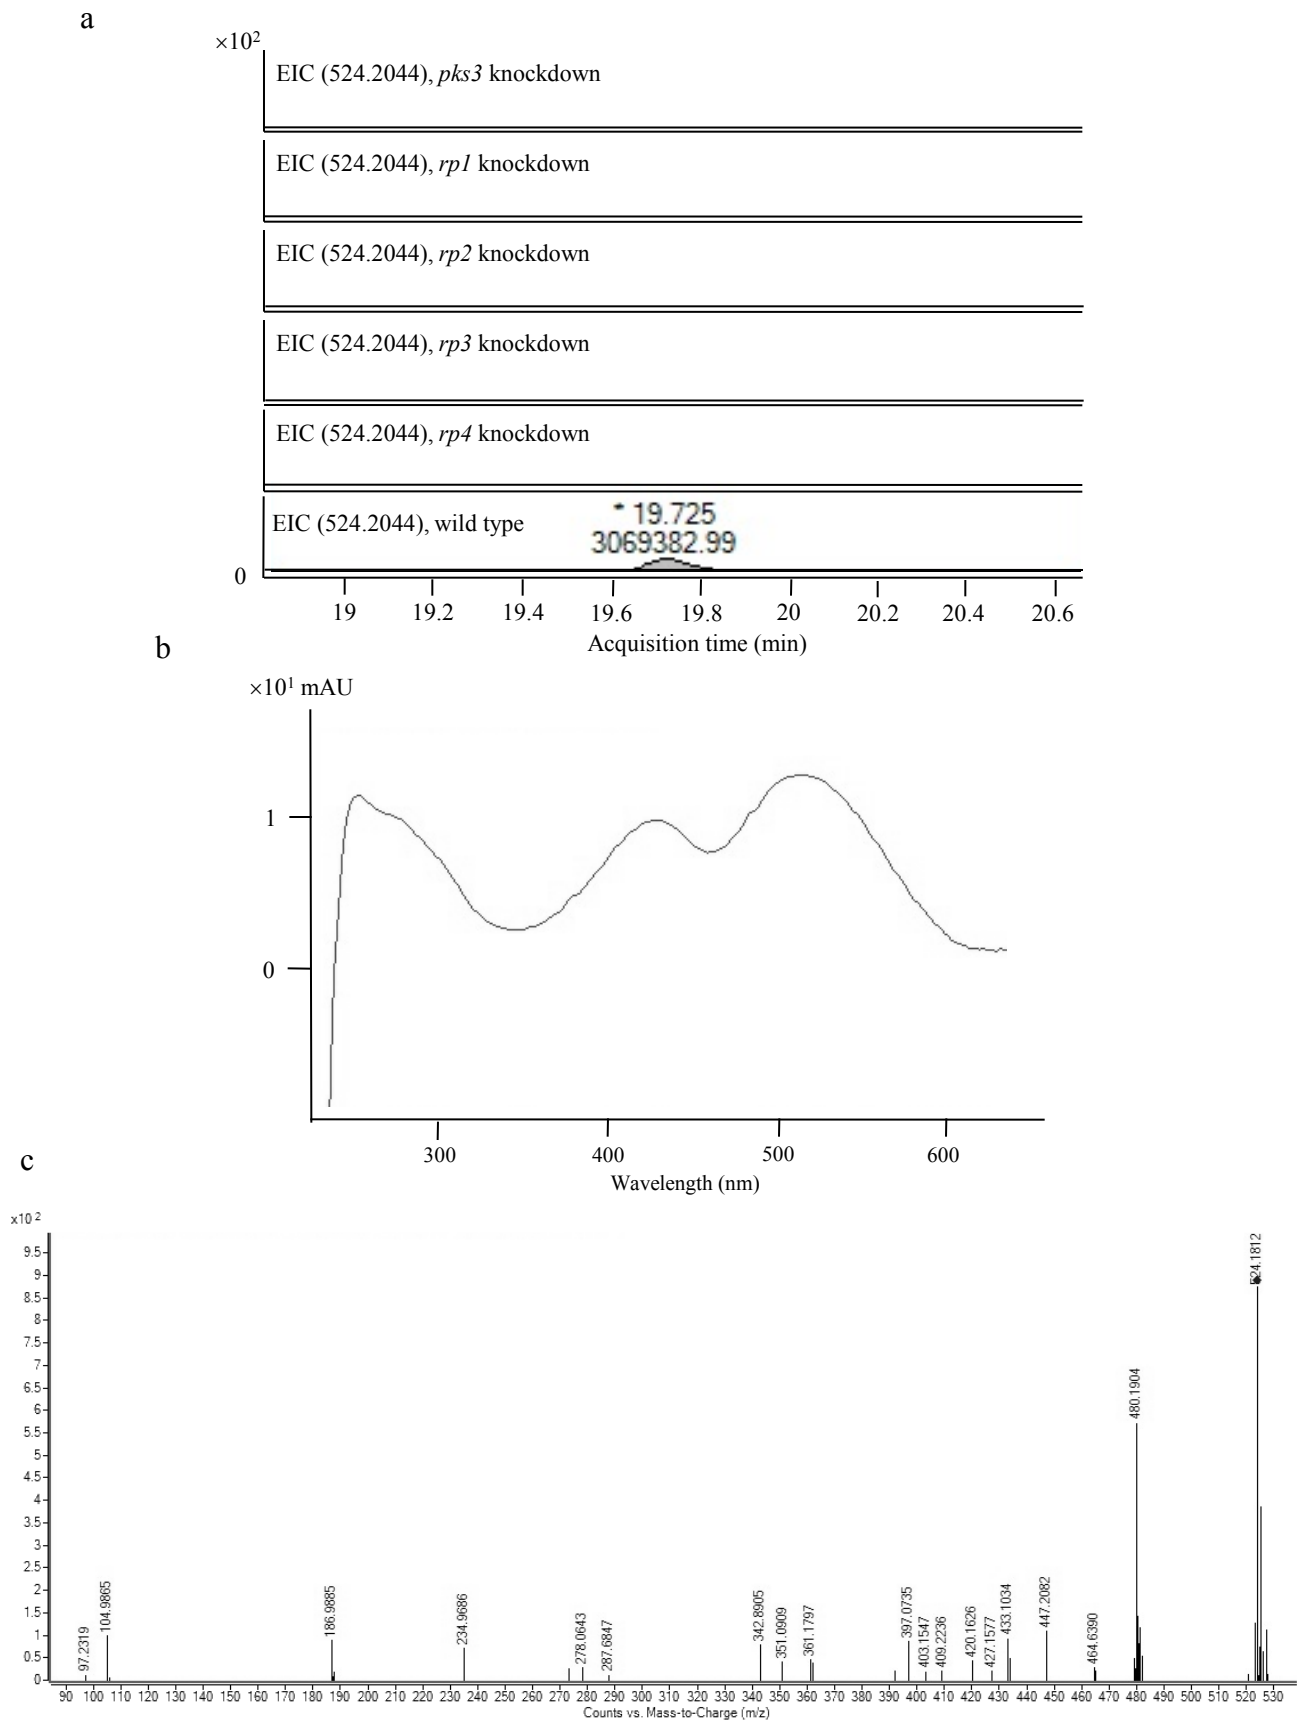

**Supplementary Figure S17: Detection of phenylalanine conjugated with rubropunctatin in *P. marneffei*.** (a) Extracted ion chromatogram, (b) UV absorption spectrum and (c) MS/MS fragmentation pattern showing the presence of phenylalanine-rubropunctatin conjugate detected in wild type *P. marneffei* but not in *pks3* or *rp1* to *rp4* knockdown mutants.

**Supplementary Table S1: Relative expression of all genes involved in biosynthesis of red pigment in different knockdown mutants of *Penicillium marneffe*.**

| <i>P. marneffe</i> strains | Relative expression |            |            |            |            |
|----------------------------|---------------------|------------|------------|------------|------------|
|                            | <i>pks3</i>         | <i>rp1</i> | <i>rp2</i> | <i>rp3</i> | <i>rp4</i> |
| Wild type                  | 1                   | 1          | 1          | 1          | 1          |
| <i>pks3</i> KD mutant      | <0.01               | 0.13       | 0.08       | 0.05       | 0.05       |
| <i>rp1</i> KD mutant       | 0.05                | 0.15       | 0.12       | 0.01       | 0.10       |
| <i>rp2</i> KD mutant       | 0.54                | 0.91       | 0.23       | 0.90       | 0.52       |
| <i>rp3</i> KD mutant       | 0.98                | 1.06       | 0.30       | 0.33       | 0.73       |
| <i>rp4</i> KD mutant       | 0.44                | 0.62       | 0.22       | 2.10       | 0.29       |

**Supplementary Table S2: UV-Vis spectroscopic absorption maxima of culture filtrates in *Penicillium marneffe*.**

| Sample                 | Absorption maxima |     |     |     |
|------------------------|-------------------|-----|-----|-----|
| wild type              | 373               | 405 | 499 | 553 |
| <i>orf1</i> knockdown  | 373               | 411 | 501 | 553 |
| <i>orf2</i> knockdown  | 373               | 416 | 499 | 556 |
| <i>orf3</i> knockdown  | 373               | 416 | 500 | 558 |
| <i>orf4</i> knockdown  | 373               | 404 | 498 | 556 |
| <i>orf5</i> knockdown  | 372               | 414 | 503 | 558 |
| <i>pks3</i> knockdown  | ---               | --- | --- | 560 |
| <i>rp1</i> knockdown   | ---               | --- | --- | 559 |
| <i>rp2</i> knockdown   | 372               | 404 | --- | 561 |
| <i>rp3</i> knockdown   | 372               | 404 | --- | 561 |
| <i>rp4</i> knockdown   | 372               | 411 | --- | 559 |
| <i>orf6</i> knockdown  | 373               | 417 | 500 | 557 |
| <i>orf7</i> knockdown  | 372               | 417 | 496 | 553 |
| <i>orf8</i> knockdown  | 374               | 416 | 499 | 554 |
| <i>orf9</i> knockdown  | 376               | 417 | 499 | 556 |
| <i>orf10</i> knockdown | 373               | 409 | 494 | 557 |
| medium                 | ---               | --- | --- | 560 |

**Supplementary Table S3: Molecular formula, mass-to-charge ratio and retention time of different amino acids conjugated with monascorubrin or rubropunctatin in culture filtrate of *Penicillium marneffe* detected by UHPLC-MS analysis.**

| <b>Name</b>                 | <b>Molecular Formula</b>                                      | <b>Mass-to-charge ratio</b> | <b>Retention time (min)</b> |
|-----------------------------|---------------------------------------------------------------|-----------------------------|-----------------------------|
| Arginine-monascorubrin      | C <sub>29</sub> H <sub>38</sub> N <sub>4</sub> O <sub>6</sub> | 538.2791                    | 16.037                      |
| Arginine-rubropunctatin     | C <sub>27</sub> H <sub>34</sub> N <sub>4</sub> O <sub>6</sub> | 510.2478                    | 13.407                      |
| Asparagine-monascorubrin    | C <sub>27</sub> H <sub>32</sub> N <sub>2</sub> O <sub>7</sub> | 496.2282                    | 18.901                      |
| Aspartic acid-monascorubrin | C <sub>27</sub> H <sub>31</sub> NO <sub>8</sub>               | 497.2050                    | 19.584                      |
| Glutamic acid-monascorubrin | C <sub>28</sub> H <sub>33</sub> NO <sub>8</sub>               | 511.2206                    | 19.205                      |
| Glycine-monascorubrin       | C <sub>25</sub> H <sub>29</sub> NO <sub>6</sub>               | 439.1995                    | 19.533                      |
| Isoleucine-monascorubrin    | C <sub>29</sub> H <sub>37</sub> NO <sub>6</sub>               | 495.2621                    | 23.197                      |
| Leucine-monascorubrin       | C <sub>29</sub> H <sub>37</sub> NO <sub>6</sub>               | 495.2621                    | 22.941                      |
| Lysine-monascorubrin        | C <sub>29</sub> H <sub>38</sub> N <sub>2</sub> O <sub>6</sub> | 510.2730                    | 16.913                      |
| Methionine-monascorubrin    | C <sub>28</sub> H <sub>35</sub> NSO <sub>6</sub>              | 513.2185                    | 22.279                      |
| Phenylalaine-monascorubrin  | C <sub>32</sub> H <sub>35</sub> NO <sub>6</sub>               | 529.2464                    | 23.209                      |
| Phenylalaine rubropunctatin | C <sub>30</sub> H <sub>31</sub> NO <sub>6</sub>               | 502.2224                    | 19.730                      |
| Serine-monascorubrin        | C <sub>26</sub> H <sub>31</sub> NO <sub>7</sub>               | 469.2101                    | 18.901                      |
| Tryptophan-monascorubrin    | C <sub>34</sub> H <sub>36</sub> N <sub>2</sub> O <sub>6</sub> | 568.2573                    | 20.696                      |
| Tyrosine-monascorubrin      | C <sub>32</sub> H <sub>35</sub> NO <sub>7</sub>               | 545.2414                    | 19.348                      |
| Valine-monascorubrin        | C <sub>28</sub> H <sub>35</sub> NO <sub>6</sub>               | 481.2464                    | 22.157                      |

**Supplementary Table S4: Primers and plasmids used for gene knockdown experiments in the present study.**

| Gene        | Primer    | RE site         | F/R | Sequence (5'-3')                        | Plasmid |
|-------------|-----------|-----------------|-----|-----------------------------------------|---------|
| <i>orf1</i> | LPW17686  | <i>Xho</i> I    | F   | <u>CCGCTCGAGTATGTCCGGGCACAGACAAG</u>    | pPW2284 |
|             | LPW17687  | <i>Hind</i> III | R   | <u>CCCAAGCTTGGGAGTGGGACGCAGTTGACACC</u> |         |
|             | LPW17688  | <i>Kpn</i> I    | F   | <u>GGGGTACCTATGTCCGGGCACAGACAAG</u>     |         |
|             | LPW17689  | <i>Bgl</i> II   | R   | <u>GAAGATCTAGTGGGACGCAGTTGACACC</u>     |         |
| <i>orf2</i> | LPW17690  | <i>Xho</i> I    | F   | <u>CCGCTCGAGGGGAGAACGTGCTTTTGCTC</u>    | pPW2285 |
|             | LPW17691  | <i>Hind</i> III | R   | <u>CCCAAGCTTGGGGAAGGAGCCGGTGACTTCAA</u> |         |
|             | LPW17692  | <i>Kpn</i> I    | F   | <u>GGGGTACCGGGAGAACGTGCTTTTGCTC</u>     |         |
|             | LPW17693  | <i>Bgl</i> II   | R   | <u>GAAGATCTGAAGGAGCCGGTGACTTCAA</u>     |         |
| <i>orf3</i> | LPW17694  | <i>Xho</i> I    | F   | <u>CCGCTCGAGCGACACATACGATCATCCAGCA</u>  | pPW2286 |
|             | LPW17695  | <i>Hind</i> III | R   | <u>CCCAAGCTTGGGTGTCGCTACCAGTTGGCTCA</u> |         |
|             | LPW17696  | <i>Kpn</i> I    | F   | <u>GGGGTACCCGACACATACGATCATCCAGCA</u>   |         |
|             | LPW17697  | <i>Bgl</i> II   | R   | <u>GAAGATCTTGTGCTACCAGTTGGCTCA</u>      |         |
| <i>orf4</i> | LPW17698  | <i>Xho</i> I    | F   | <u>CCGCTCGAGCGATACTCCGTGTGAAAGACTGC</u> | pPW2287 |
|             | LPW17699  | <i>Hind</i> III | R   | <u>CCCAAGCTTGGGGTGGCTGTGGTCAAGCAGTG</u> |         |
|             | LPW17700  | <i>Kpn</i> I    | F   | <u>GGGGTACCCGATACTCCGTGTGAAAGACTGC</u>  |         |
|             | LPW17701  | <i>Bgl</i> II   | R   | <u>GAAGATCTGTGGCTGTGGTCAAGCAGTG</u>     |         |
| <i>orf5</i> | LPW17702  | <i>Xho</i> I    | F   | <u>CCGCTCGAGCGTTTTTCGTTACCGGAGGTT</u>   | pPW2288 |
|             | LPW17703  | <i>Hind</i> III | R   | <u>CCCAAGCTTGGGAGCATGGGTAGGAATGACCG</u> |         |
|             | LPW17704  | <i>Kpn</i> I    | F   | <u>GGGGTACCCGTTTTTCGTTACCGGAGGTT</u>    |         |
|             | LPW17705  | <i>Bgl</i> II   | R   | <u>GAAGATCTAGCATGGGTAGGAATGACCG</u>     |         |
|             |           |                 |     |                                         |         |
| <i>pks3</i> | LPW9873   | <i>Xho</i> I    | F   | <u>CCGCTCGAGCCTTCTCTTTCGGATCTCTTC</u>   | pPW1294 |
|             | LPW9874   | <i>Kpn</i> I    | F   | <u>GGGGTACCCCTTCTCTTTCGGATCTCTTC</u>    |         |
|             | LPW9875   | <i>Bgl</i> II   | R   | <u>GAAGATCTGCCTAATGTCAAGCTTTTCG</u>     |         |
| <i>rp1</i>  | LPW 18206 | <i>Xho</i> I    | F   | <u>CCGCTCGAGCTGCTGGCGATACCGAGTTC</u>    | pPW2422 |
|             | LPW 18207 | <i>Hind</i> III | R   | <u>CCCAAGCTTGGGGCAAGGCATCAGCTCAATGA</u> |         |
|             | LPW 18208 | <i>Kpn</i> I    | F   | <u>GGGGTACCCTGCTGGCGATACCGAGTTC</u>     |         |
|             | LPW 18209 | <i>Bgl</i> II   | R   | <u>GAAGATCTGCAAGGCATCAGCTCAATGA</u>     |         |
| <i>rp2</i>  | LPW 17706 | <i>Xho</i> I    | F   | <u>CCGCTCGAGCATGGGCTACTCGGTTTGGGA</u>   | pPW2289 |
|             | LPW 17707 | <i>Hind</i> III | R   | <u>CCCAAGCTTGGGGTTCGCCTTTGGAGTTCTGC</u> |         |
|             | LPW 17708 | <i>Kpn</i> I    | F   | <u>GGGGTACCCATGGGCTACTCGGTTTGGGA</u>    |         |
|             | LPW 17709 | <i>Bgl</i> II   | R   | <u>GAAGATCTGTTTCGCCTTTGGAGTTCTGC</u>    |         |
| <i>rp3</i>  | LPW 18210 | <i>Xho</i> I    | F   | <u>CCGCTCGAGGCAGTAATCGGTTGGGTTTCG</u>   | pPW2423 |
|             | LPW 18211 | <i>Hind</i> III | R   | <u>CCCAAGCTTGGGCGCATGGAAGTGAAGGATGA</u> |         |
|             | LPW 18212 | <i>Kpn</i> I    | F   | <u>GGGGTACCCGAGTAATCGGTTGGGTTTCG</u>    |         |
|             | LPW 18213 | <i>Bgl</i> II   | R   | <u>GAAGATCTCGCATGGAAGTGAAGGATGA</u>     |         |
| <i>rp4</i>  | LPW 18214 | <i>Xho</i> I    | F   | <u>CCGCTCGAGAAAGTCAATGACCCTGCCGA</u>    | pPW2424 |
|             | LPW 18215 | <i>Hind</i> III | R   | <u>CCCAAGCTTGGGGTCAAAGACCTGGCTGGCAC</u> |         |
|             | LPW 18216 | <i>Kpn</i> I    | F   | <u>GGGGTACCAAAGTCAATGACCCTGCCGA</u>     |         |
|             | LPW 18217 | <i>Bgl</i> II   | R   | <u>GAAGATCTGTCAAAGACCTGGCTGGCAC</u>     |         |

| Gene         | Primer   | RE site        | F/R | Sequence (5'-3')                            | Plasmid |
|--------------|----------|----------------|-----|---------------------------------------------|---------|
| <i>orf6</i>  | LPW18683 | <i>XhoI</i>    | F   | <u>CCGCTCGAGATAGACCTGAAATGGTTCCGATGG</u>    | pPW2425 |
|              | LPW18684 | <i>HindIII</i> | R   | <u>CCCAAGCTTGGGGTGATGTAAATCCTCATCGAGCAG</u> |         |
|              | LPW18685 | <i>KpnI</i>    | F   | <u>GGGGTACCATAGACCTGAAATGGTTCCGATGG</u>     |         |
|              | LPW18686 | <i>BglII</i>   | F   | <u>GAAGATCTGTGATGTAAATCCTCATCGAGCAG</u>     |         |
| <i>orf7</i>  | LPW18426 | <i>XhoI</i>    | R   | <u>CCGCTCGAGAGGCTCCTTTCTCCTCCGAT</u>        | pPW2426 |
|              | LPW18427 | <i>HindIII</i> | F   | <u>CCCAAGCTTGGGTGAACGTGGATTGTGGGAAG</u>     |         |
|              | LPW18428 | <i>KpnI</i>    | R   | <u>GGGGTACCAGGCTCCTTTCTCCTCCGAT</u>         |         |
|              | LPW18429 | <i>BglII</i>   | F   | <u>GAAGATCTTGAACGTGGATTGTGGGAAG</u>         |         |
| <i>orf8</i>  | LPW18430 | <i>XhoI</i>    | R   | <u>CCGCTCGAGCGCTGTGACCGAAATGGAT</u>         | pPW2427 |
|              | LPW18431 | <i>HindIII</i> | F   | <u>CCCAAGCTTGGGGGAGTCACACCGCAGATAATGA</u>   |         |
|              | LPW18432 | <i>KpnI</i>    | R   | <u>GGGGTACCCGCTGTGACCGAAATGGAT</u>          |         |
|              | LPW18433 | <i>BglII</i>   | F   | <u>GAAGATCTGGAGTCACACCGCAGATAATGA</u>       |         |
| <i>orf9</i>  | LPW18434 | <i>XhoI</i>    | F   | <u>CCGCTCGAGCTGGTTGGAGGTGCCTTGA</u>         | pPW2428 |
|              | LPW18435 | <i>HindIII</i> | R   | <u>CCCAAGCTTGGGGCCATACTGTGCGAATCGTA</u>     |         |
|              | LPW18436 | <i>KpnI</i>    | F   | <u>GGGGTACCCTGGTTGGAGGTGCCTTGA</u>          |         |
|              | LPW18437 | <i>BglII</i>   | R   | <u>GAAGATCTGCCATACTGTGCGAATCGTA</u>         |         |
| <i>orf10</i> | LPW18438 | <i>XhoI</i>    | F   | <u>CCGCTCGAGGAGGAGGAAATTGACCAGACTGG</u>     | pPW2429 |
|              | LPW18439 | <i>HindIII</i> | R   | <u>CCCAAGCTTGGGGGTCAGACCTTCCTTGCCGT</u>     |         |
|              | LPW18440 | <i>KpnI</i>    | F   | <u>GGGGTACCGAGGAGGAAATTGACCAGACTGG</u>      |         |
|              | LPW18441 | <i>BglII</i>   | R   | <u>GAAGATCTGGTCAGACCTTCCTTGCCGT</u>         |         |
